# Supplementary material
Source: PubMed Central journal article supplement (PMC8661428)

This supplementary document contains a table of all included independent variables along with the % variance of the model predictions explained by their main effect.

Additionally it contains main effects plots for all included predictors.

| <b>Variable</b>                      | <b>Group</b> | <b>Type</b> | <b>pct.variance</b> |
|--------------------------------------|--------------|-------------|---------------------|
| days_since_pc                        | Utilization  | numeric     | 21.48               |
| UNIT.TRANSFER                        | Other        | categorical | 20.9                |
| Troponin                             | Lab          | numeric     | 11.48               |
| Bilirubin                            | Lab          | numeric     | 11.36               |
| Albumin                              | Lab          | numeric     | 11.08               |
| AnionGap                             | Lab          | numeric     | 9.64                |
| NeutrophilCount                      | Lab          | numeric     | 8.81                |
| AST                                  | Lab          | numeric     | 8.61                |
| Lactate                              | Lab          | numeric     | 6.94                |
| INR                                  | Lab          | numeric     | 6.94                |
| Creatine                             | Lab          | numeric     | 6.67                |
| ALT                                  | Lab          | numeric     | 6.39                |
| Phosphate                            | Lab          | numeric     | 6.36                |
| Hct                                  | Lab          | numeric     | 5                   |
| Hb                                   | Lab          | numeric     | 4.71                |
| PartPressureArterialO2               | Lab          | numeric     | 4.63                |
| Sodium                               | Lab          | numeric     | 4.41                |
| age                                  | Demographics | numeric     | 4.4                 |
| Ammonia                              | Lab          | numeric     | 4.32                |
| Metastatic_Cancer_and_Acute_Leukemia | Comorbidity  | binary      | 4.22                |
| adt.hospitalizations_12mnth          | Utilization  | numeric     | 4.11                |
| adt.hospitalizations_6mnth           | Utilization  | numeric     | 3.78                |
| ICUTRANSFER                          | Other        | binary      | 3.73                |
| Potassium                            | Lab          | numeric     | 3.46                |
| Calcium                              | Lab          | numeric     | 3.2                 |
| Platelets                            | Lab          | numeric     | 3.18                |
| BicarbonateArterialBloodGas          | Lab          | numeric     | 2.99                |
| BaseDeficit                          | Lab          | numeric     | 2.97                |
| pHArterialBloodGas                   | Lab          | numeric     | 2.63                |
| PartPressureArterialCO2              | Lab          | numeric     | 2.53                |
| adt.icu_12mnth                       | Utilization  | numeric     | 2.31                |
| Lung_and_Other_Severe_Cancers        | Comorbidity  | binary      | 1.98                |

|                                       |              |             |      |
|---------------------------------------|--------------|-------------|------|
| adt.icu_6mnth                         | Utilization  | numeric     | 1.69 |
| APTT                                  | Lab          | numeric     | 1.68 |
| cameFrom                              | Demographics | categorical | 1.47 |
| Lipase                                | Lab          | numeric     | 1.32 |
| community                             | Demographics | binary      | 1.09 |
| Pressure_Pre_Ulcer_Skin_Changes_or_Un | Comorbidity  | binary      | 0.9  |
| Septicemia_Sepsis_Systemic_Inflammato | Comorbidity  | binary      | 0.77 |
| Congestive_Heart_Failure              | Comorbidity  | binary      | 0.76 |
| Aspiration_and_Specified_Bacterial_Pn | Comorbidity  | binary      | 0.66 |
| Specified_Heart_Arrhythmias           | Comorbidity  | binary      | 0.63 |
| Disorders_of_Immunity                 | Comorbidity  | binary      | 0.59 |
| Acute_Renal_Failure                   | Comorbidity  | binary      | 0.56 |
| Cardio_Respiratory_Failure_and_Shock  | Comorbidity  | binary      | 0.54 |
| Dementia_Without_Complication         | Comorbidity  | binary      | 0.53 |
| Chronic_Kidney_Disease_Severe_Stage_4 | Comorbidity  | binary      | 0.51 |
| Pressure_Ulcer_of_Skin_with_Full_Thic | Comorbidity  | binary      | 0.47 |
| Chronic_Ulcer_of_Skin_Except_Pressure | Comorbidity  | binary      | 0.39 |
| Hip_Fracture_Dislocation              | Comorbidity  | binary      | 0.35 |
| Chronic_Obstructive_Pulmonary_Disease | Comorbidity  | binary      | 0.33 |
| Acute_Myocardial_Infarction           | Comorbidity  | binary      | 0.33 |
| Amylase                               | Lab          | binary      | 0.3  |
| Diabetes_with_Chronic_Complications   | Comorbidity  | binary      | 0.29 |
| Chronic_Kidney_Disease_Stage_5        | Comorbidity  | binary      | 0.26 |
| End_Stage_Liver_Disease               | Comorbidity  | binary      | 0.25 |
| Vascular_Disease_with_Complications   | Comorbidity  | binary      | 0.24 |
| Chronic_Kidney_Disease_Moderate_Stage | Comorbidity  | binary      | 0.22 |
| Lymphoma_and_Other_Cancers            | Comorbidity  | binary      | 0.21 |
| Opportunistic_Infections              | Comorbidity  | binary      | 0.21 |
| Atherosclerosis_of_the_Extremities_wi | Comorbidity  | binary      | 0.21 |
| Pneumococcal_Pneumonia_Empyema_Lung_A | Comorbidity  | binary      | 0.19 |
| Coagulation_Defects_and_Other_Specifi | Comorbidity  | binary      | 0.18 |
| Chronic_Kidney_Disease_Mild_or_Unspec | Comorbidity  | binary      | 0.18 |
| Vertebral_Fractures_without_Spinal_Co | Comorbidity  | binary      | 0.18 |
| Severe_Hematological_Disorders        | Comorbidity  | binary      | 0.17 |
| Protein_Calorie_Malnutrition          | Comorbidity  | binary      | 0.17 |
| Dialysis_Status                       | Comorbidity  | binary      | 0.17 |
| Cirrhosis_of_Liver                    | Comorbidity  | binary      | 0.16 |
| Pressure_Ulcer_of_Skin_with_Partial_T | Comorbidity  | binary      | 0.15 |

|                                       |              |         |      |
|---------------------------------------|--------------|---------|------|
| Intestinal_Obstruction_Perforation    | Comorbidity  | binary  | 0.15 |
| Polyneuropathy                        | Comorbidity  | binary  | 0.15 |
| Nephritis                             | Comorbidity  | binary  | 0.13 |
| Fibrinogen                            | Lab          | numeric | 0.1  |
| Vascular_Disease                      | Comorbidity  | binary  | 0.1  |
| Amputation_Status_Lower_Limb_Amputati | Comorbidity  | binary  | 0.09 |
| Breast_Prostate_and_Other_Cancers_and | Comorbidity  | binary  | 0.09 |
| Exudative_Macular_Degeneration        | Comorbidity  | binary  | 0.08 |
| Pressure_Ulcer_of_Skin_with_Necrosis_ | Comorbidity  | binary  | 0.08 |
| Fibrosis_of_Lung_and_Other_Chronic_Lu | Comorbidity  | binary  | 0.07 |
| Seizure_Disorders_and_Convulsions     | Comorbidity  | binary  | 0.06 |
| Unstable_Angina_and_Other_Acute_Ische | Comorbidity  | binary  | 0.06 |
| Major_Organ_Transplant_or_Replacement | Comorbidity  | binary  | 0.05 |
| Complications_of_Specified_Implanted_ | Comorbidity  | binary  | 0.05 |
| Proliferative_Diabetic_Retinopathy_an | Comorbidity  | binary  | 0.04 |
| Bone_Joint_Muscle_Infections_Necrosis | Comorbidity  | binary  | 0.04 |
| Colorectal_Bladder_and_Other_Cancers  | Comorbidity  | binary  | 0.03 |
| Morbid_Obesity                        | Comorbidity  | binary  | 0.03 |
| Unspecified_Renal_Failure             | Comorbidity  | binary  | 0.03 |
| Inflammatory_Bowel_Disease            | Comorbidity  | binary  | 0.02 |
| Traumatic_Amputations_and_Complicatio | Comorbidity  | binary  | 0.02 |
| Major_Depressive_Bipolar_and_Paranoia | Comorbidity  | binary  | 0.02 |
| Artificial_Openings_for_Feeding_or_El | Comorbidity  | binary  | 0.02 |
| Other_Significant_Endocrine_and_Metab | Comorbidity  | binary  | 0.02 |
| Schizophrenia                         | Comorbidity  | binary  | 0.02 |
| Parkinsons_and_Huntingtons_Diseases   | Comorbidity  | binary  | 0.01 |
| Chronic_Hepatitis                     | Comorbidity  | binary  | 0.01 |
| gender                                | Demographics | binary  | 0.01 |
| Respiratory_Arrest                    | Comorbidity  | binary  | 0.01 |
| DAYCOV                                | Other        | numeric | 0.01 |
| Rheumatoid_Arthritis_and_Inflammatory | Comorbidity  | binary  | 0.01 |
| Ischemic_or_Unspecified_Stroke        | Comorbidity  | binary  | 0.01 |
| Multiple_Sclerosis                    | Comorbidity  | binary  | 0.01 |
| Chronic_Pancreatitis                  | Comorbidity  | binary  | 0.01 |
| Respirator_Dependence_Tracheostomy_St | Comorbidity  | binary  | 0.01 |
| Dementia_With_Complications           | Comorbidity  | binary  | 0.01 |
| Cerebral_Palsy                        | Comorbidity  | binary  | 0.01 |
| Hemiplegia_Hemiparesis                | Comorbidity  | binary  | 0    |

|                                       |             |        |   |
|---------------------------------------|-------------|--------|---|
| Cerebral_Hemorrhage                   | Comorbidity | binary | 0 |
| Diabetes_without_Complication         | Comorbidity | binary | 0 |
| HIV_AIDS                              | Comorbidity | binary | 0 |
| Coma_Brain_Compression_Anoxic_Damage  | Comorbidity | binary | 0 |
| Quadriplegia                          | Comorbidity | binary | 0 |
| Muscular_Dystrophy                    | Comorbidity | binary | 0 |
| Paraplegia                            | Comorbidity | binary | 0 |
| Drug_Alcohol_Dependence               | Comorbidity | binary | 0 |
| Amyotrophic_Lateral_Sclerosis_and_Oth | Comorbidity | binary | 0 |
| Monoplegia_Other_Paralytic_Syndromes  | Comorbidity | binary | 0 |
| Spinal_Cord_Disorders_Injuries        | Comorbidity | binary | 0 |
| Severe_Skin_Burn_or_Condition         | Comorbidity | binary | 0 |
| Drug_Alcohol_Psychosis                | Comorbidity | binary | 0 |
| Cystic_Fibrosis                       | Comorbidity | binary | 0 |
| Angina_Pectoris                       | Comorbidity | binary | 0 |
| Major_Head_Injury                     | Comorbidity | binary | 0 |
| Diabetes_with_Acute_Complications     | Comorbidity | binary | 0 |
| Severe_Head_Injury                    | Comorbidity | binary | 0 |

days\_since\_pc (Pct.Var = 21.5)

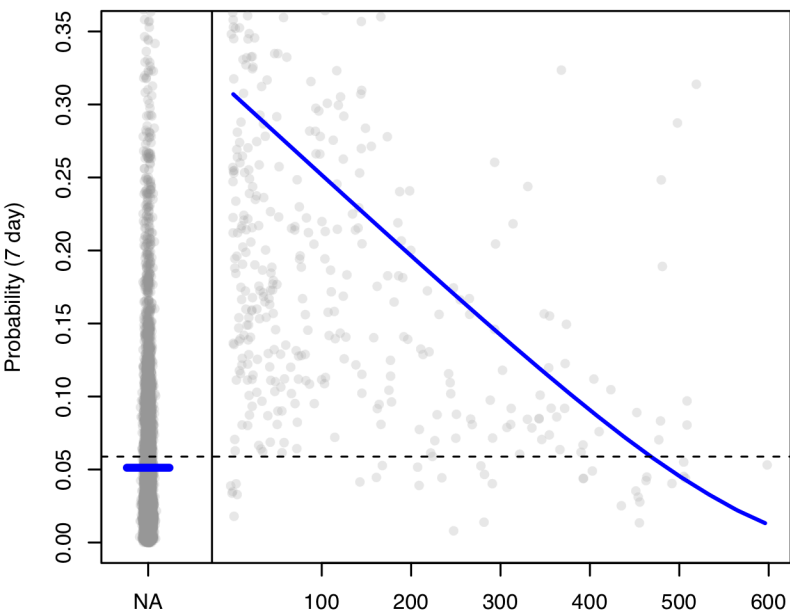

UNIT.TRANSFER (Pct.Var = 20.9)

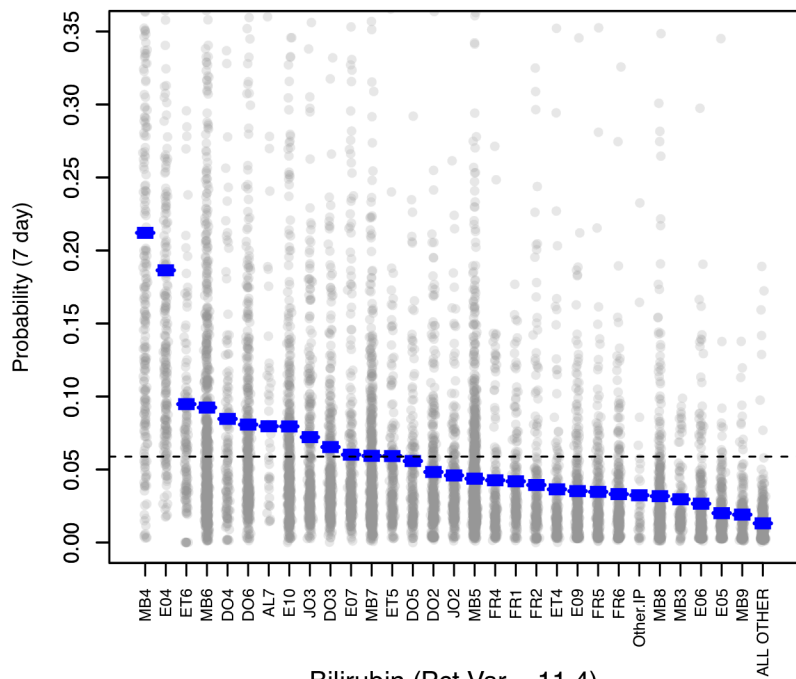

Troponin (Pct.Var = 11.5)

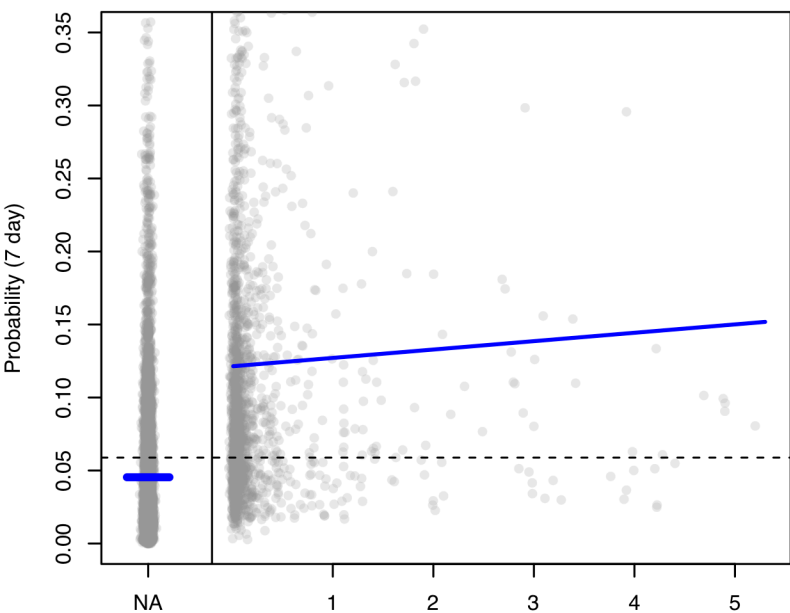

Bilirubin (Pct.Var = 11.4)

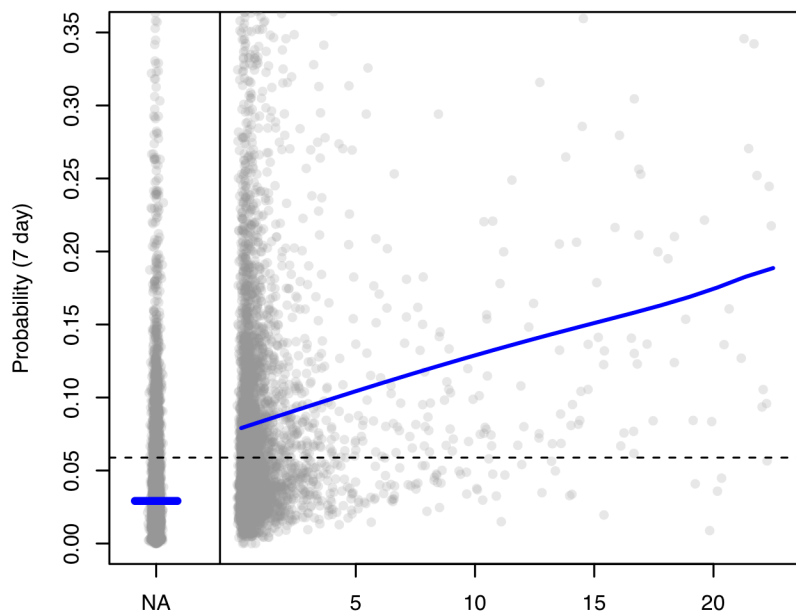

Albumin (Pct.Var = 11.1)

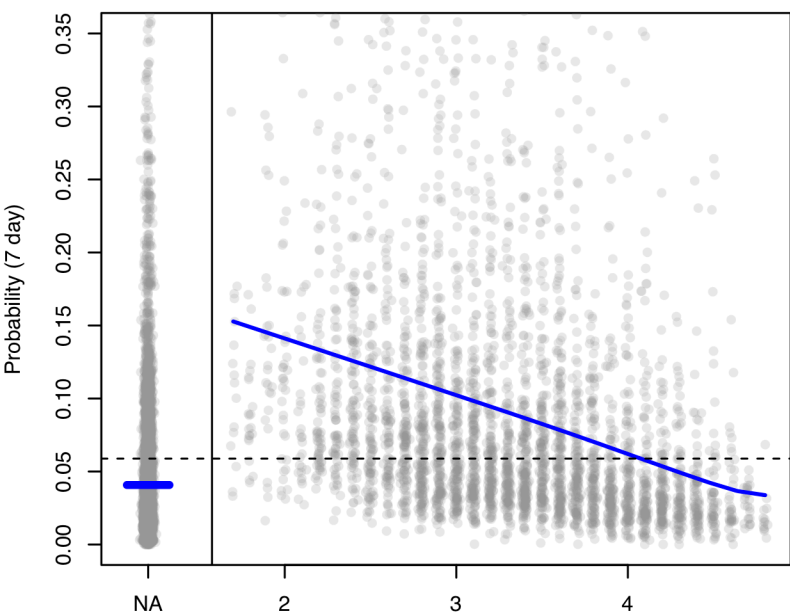

AnionGap (Pct.Var = 9.6)

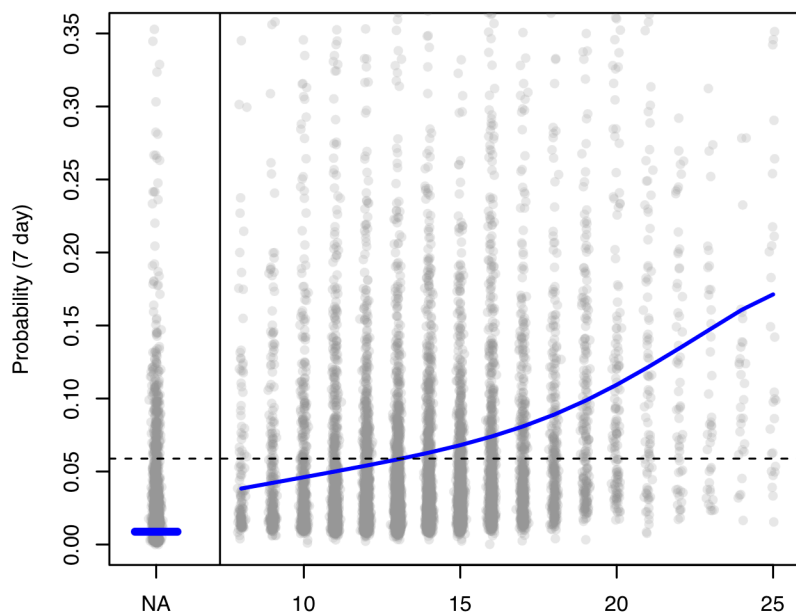

NeutrophilCount (Pct.Var = 8.8)

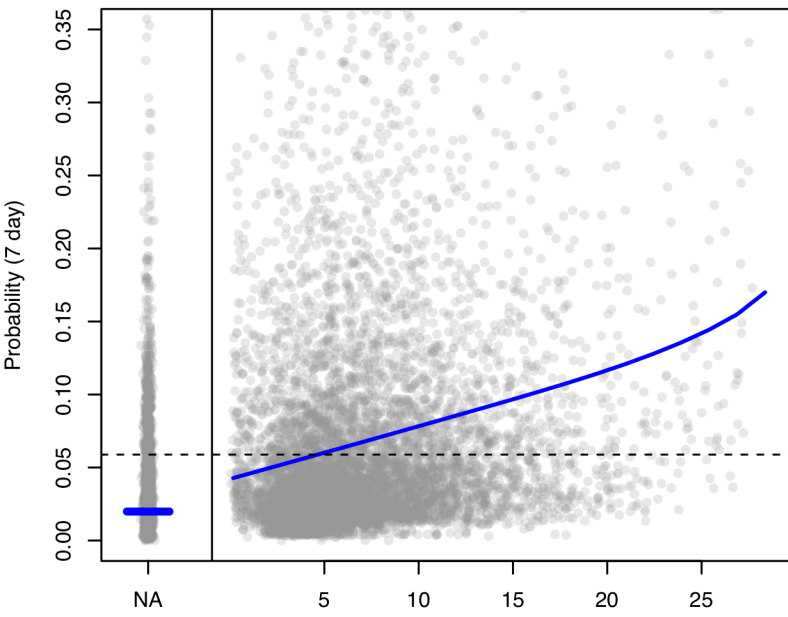

AST (Pct.Var = 8.6)

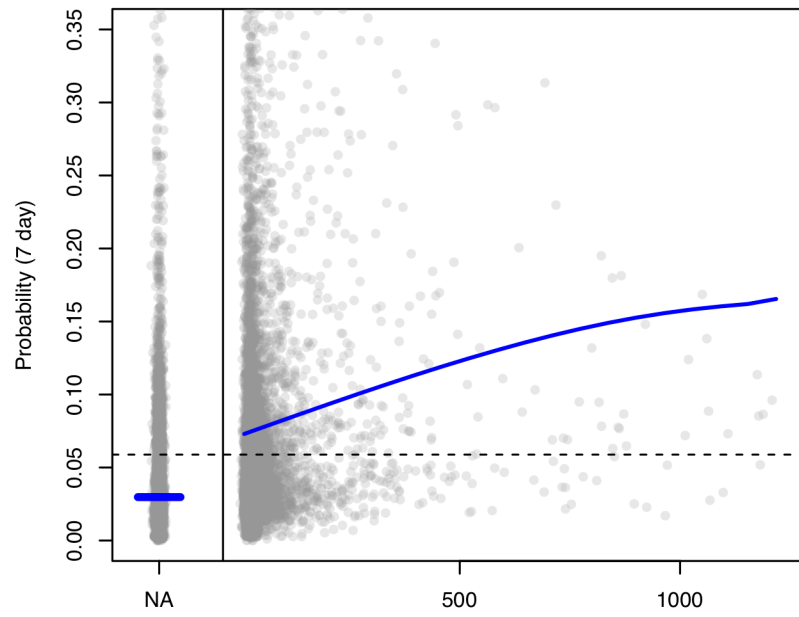

Lactate (Pct.Var = 6.9)

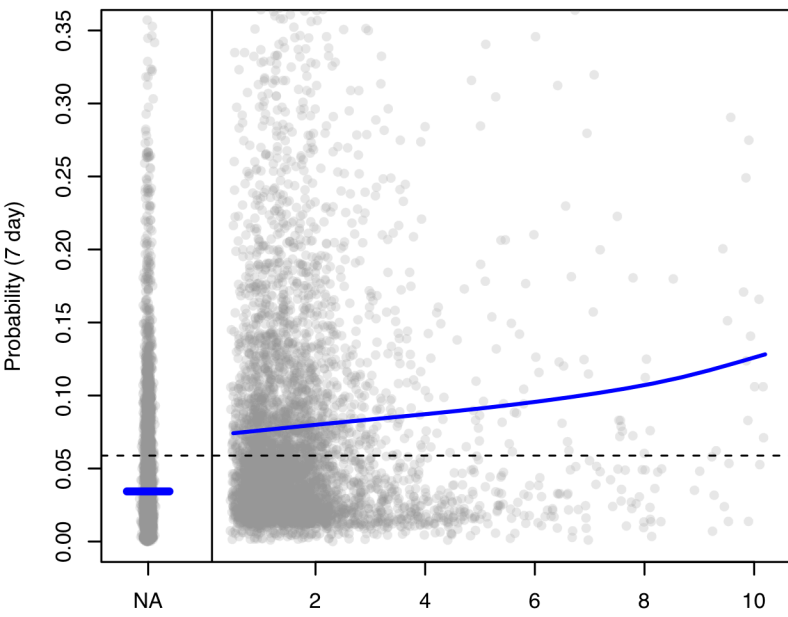

INR (Pct.Var = 6.9)

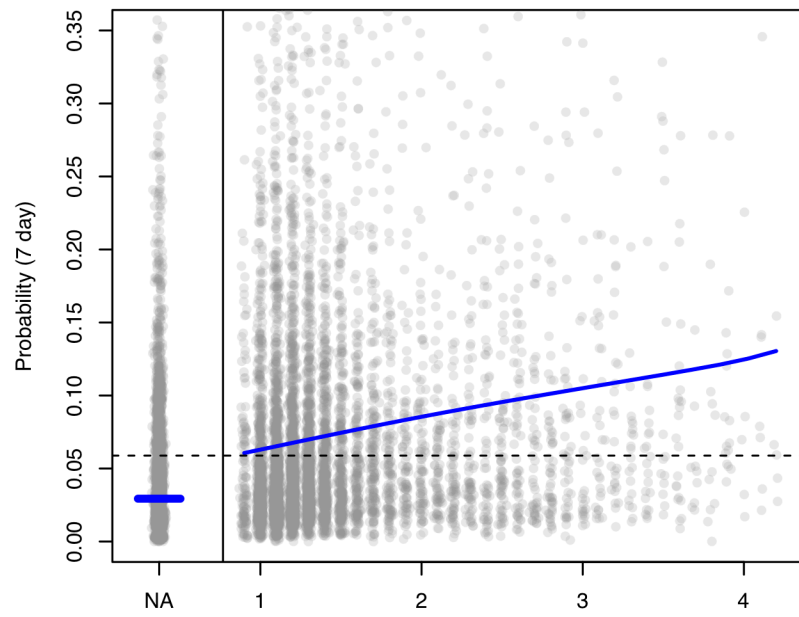

Creatine (Pct.Var = 6.7)

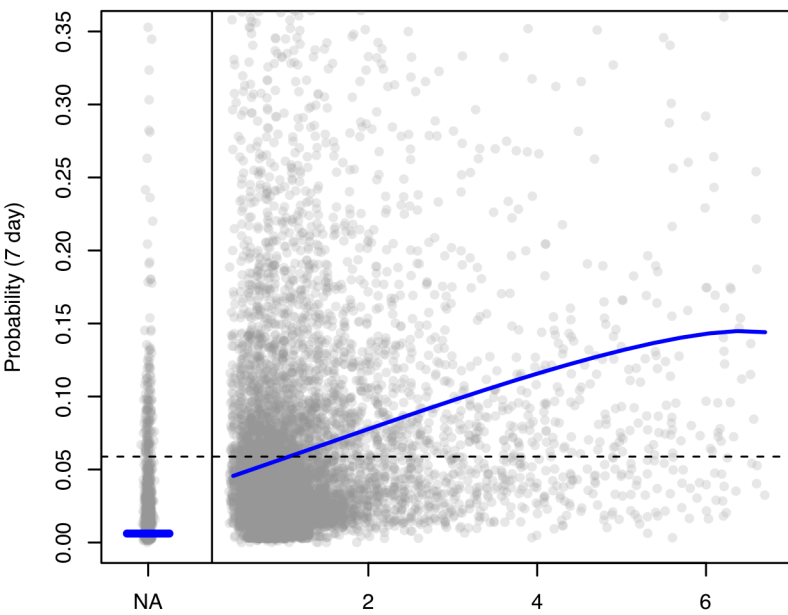

ALT (Pct.Var = 6.4)

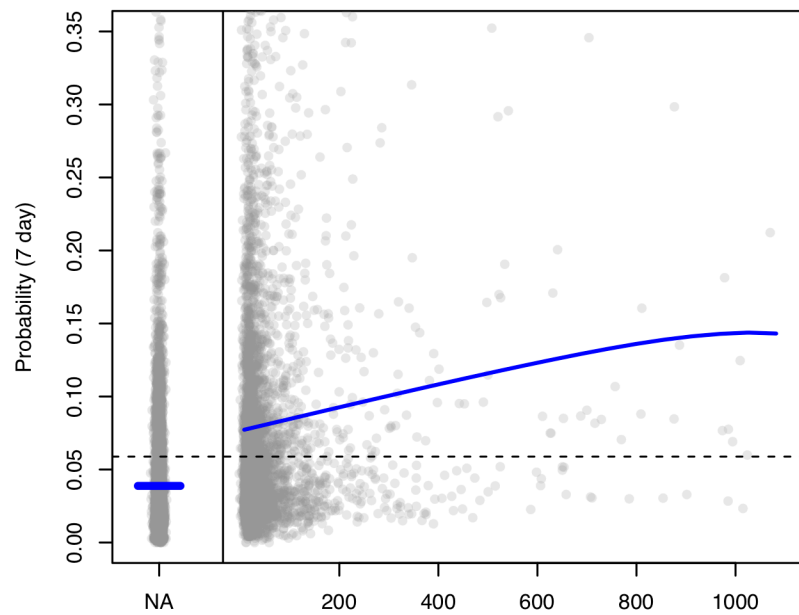

Phosphate (Pct.Var = 6.4)

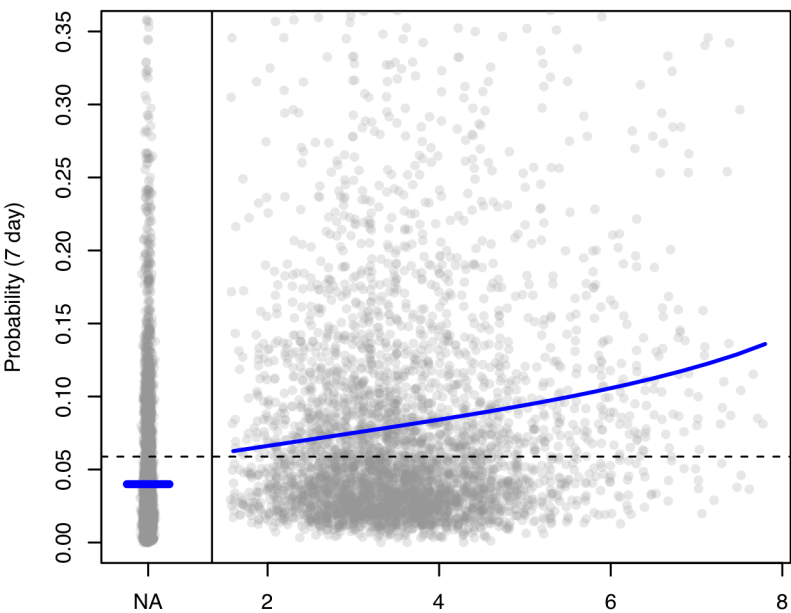

Hct (Pct.Var = 5.0)

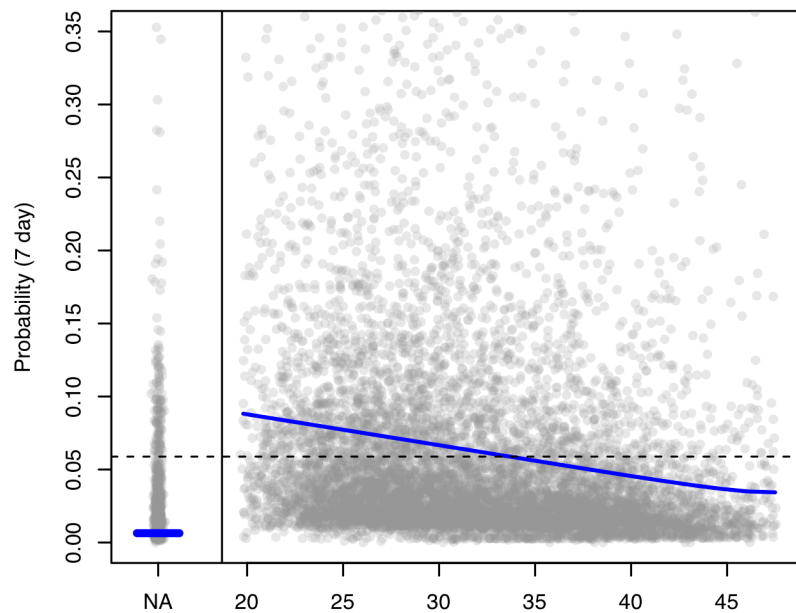

Hb (Pct.Var = 4.7)

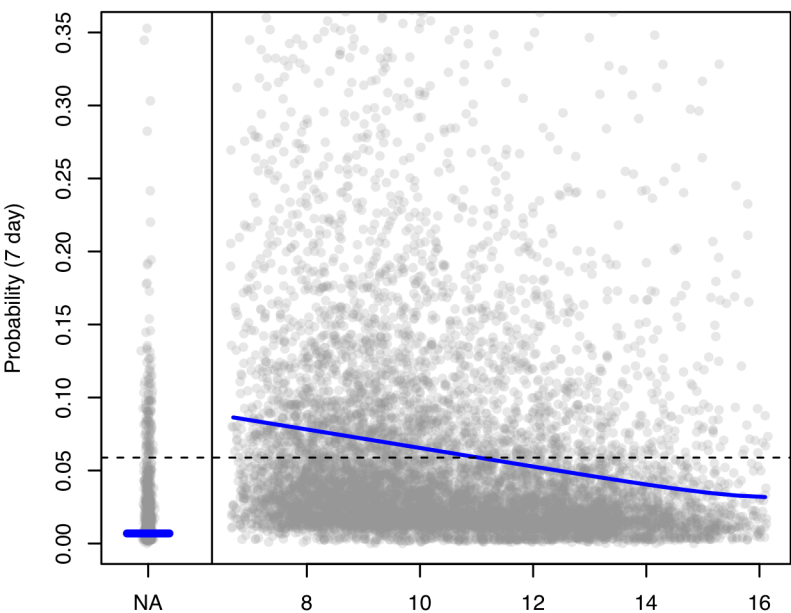

PartPressureArterialO2 (Pct.Var = 4.6)

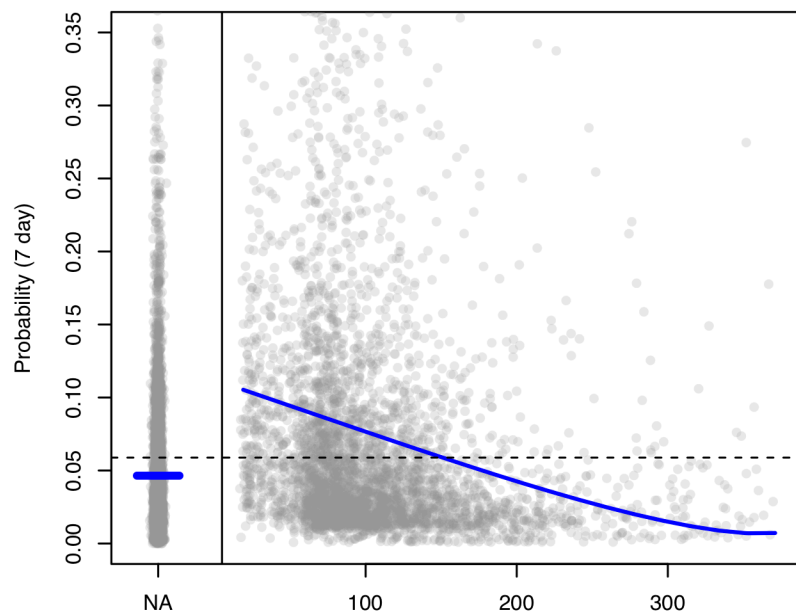

Sodium (Pct.Var = 4.4)

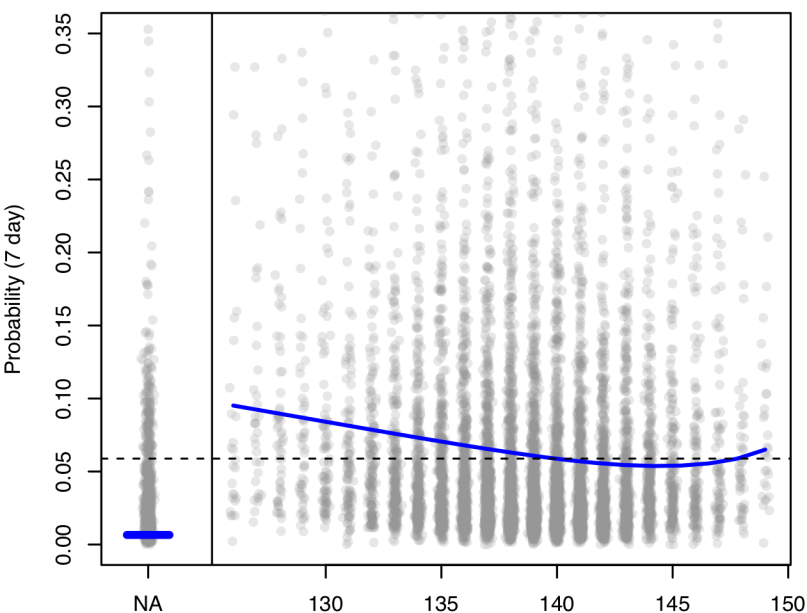

age (Pct.Var = 4.4)

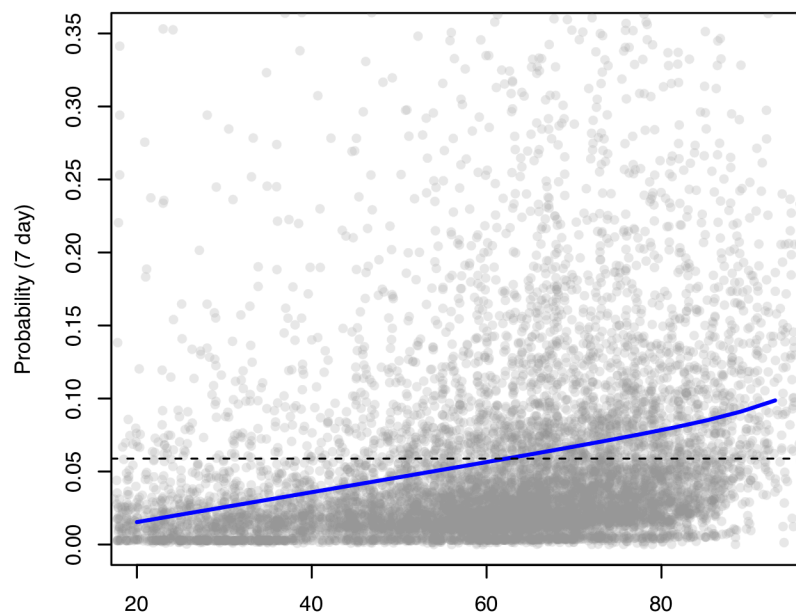

Ammonia (Pct.Var = 4.3)

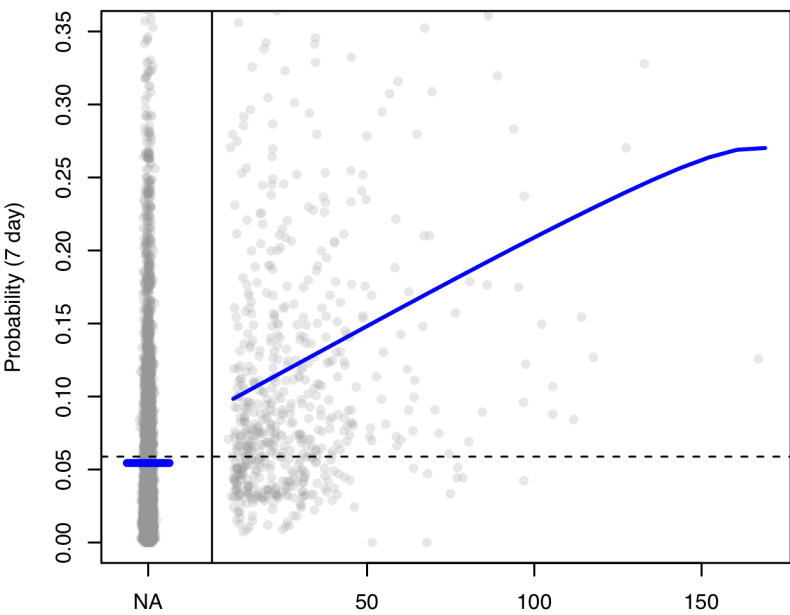

Metastatic\_Cancer\_and\_Acute\_Leukemia (Pct.Var = 4.2)

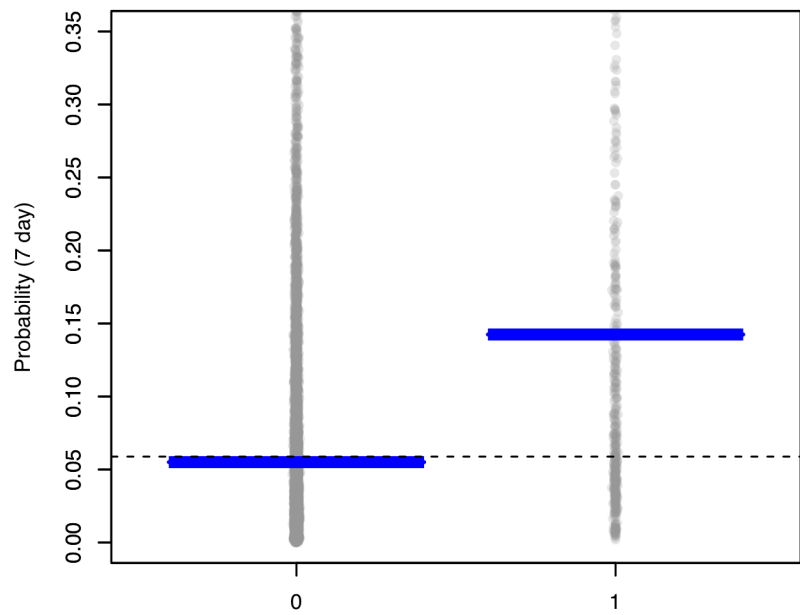

adt.hospitalizations\_12mnth (Pct.Var = 4.1)

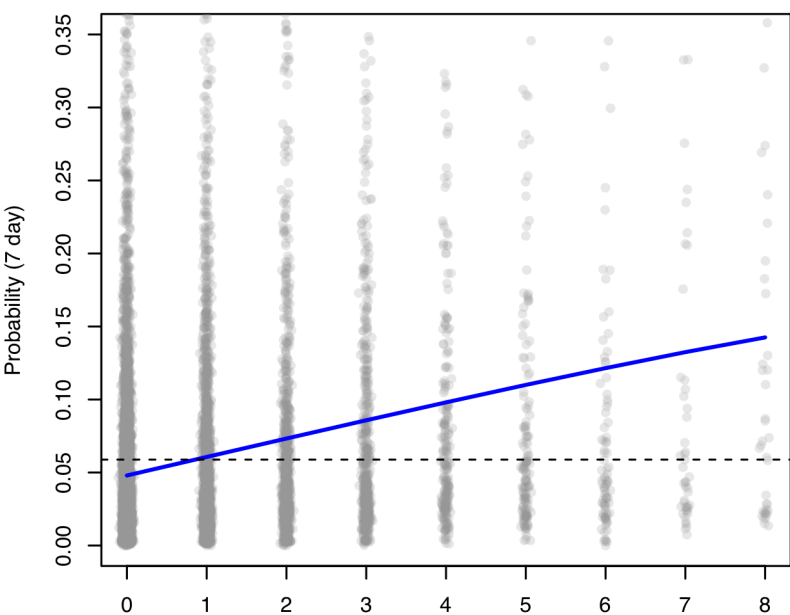

adt.hospitalizations\_6mnth (Pct.Var = 3.8)

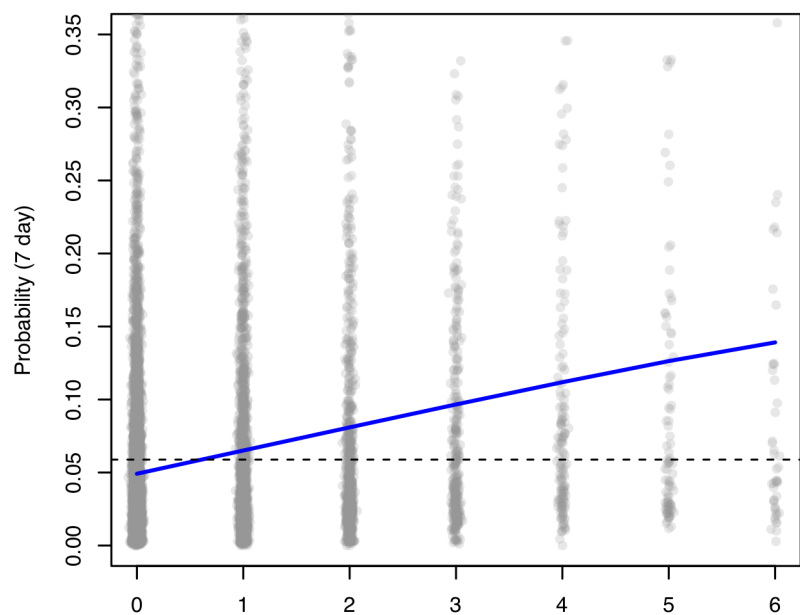

ICUTRANSFER (Pct.Var = 3.7)

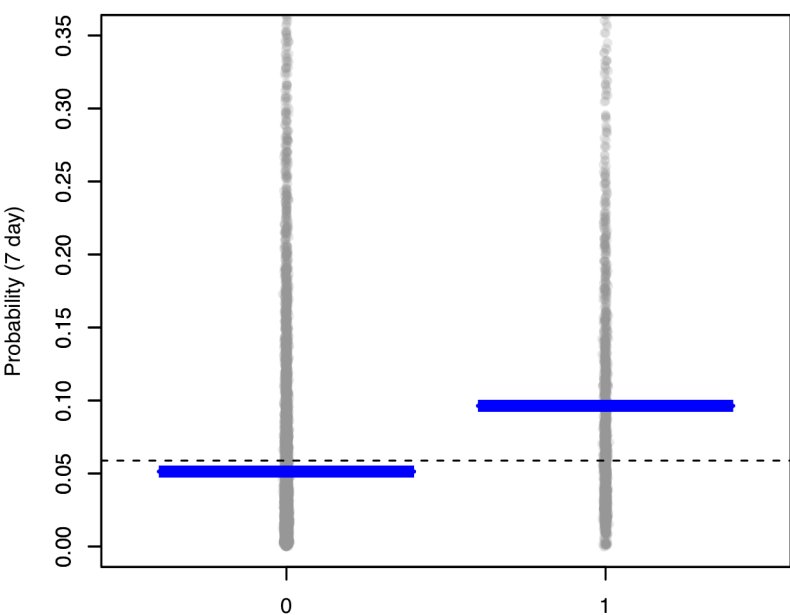

Potassium (Pct.Var = 3.5)

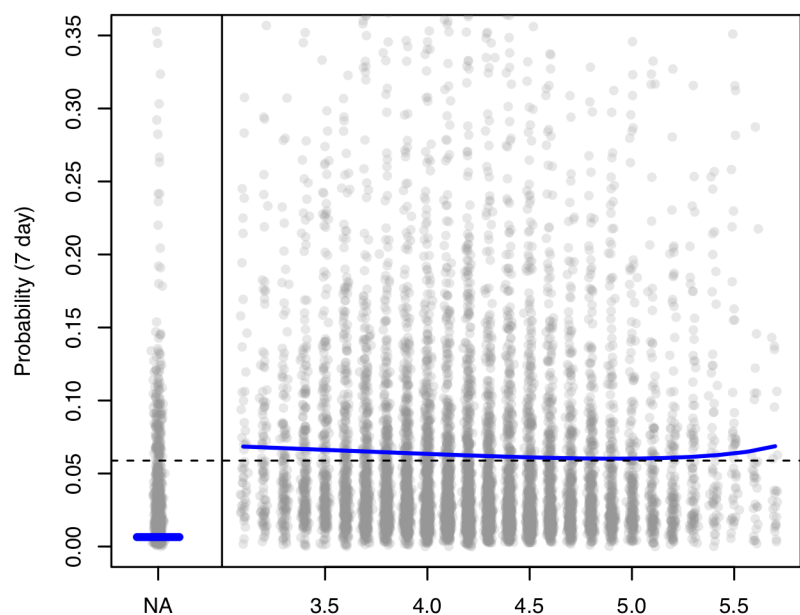



Calcium (Pct.Var = 3.2)

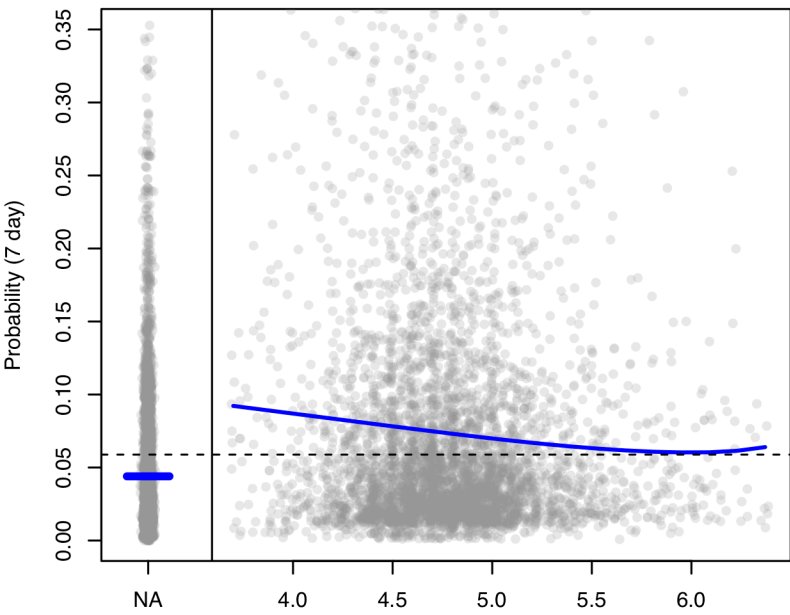

Platelets (Pct.Var = 3.2)

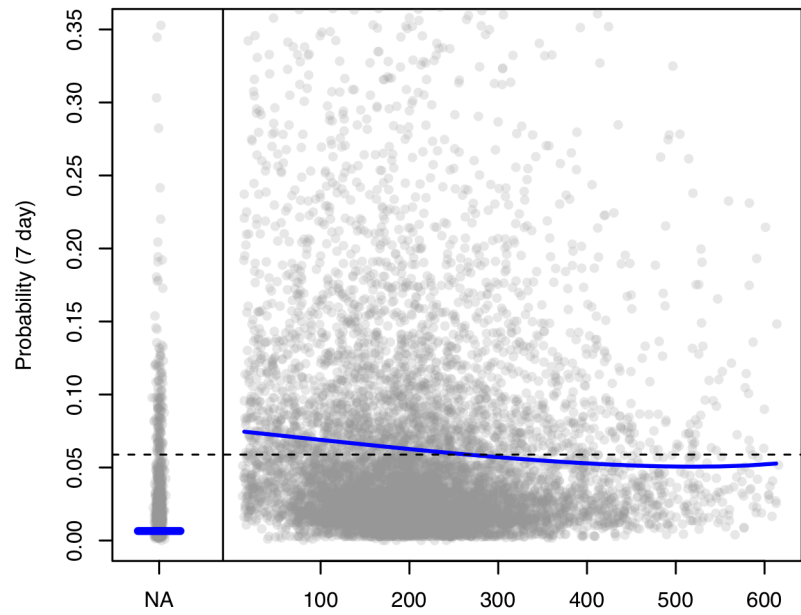

BicarbonateArterialBloodGas (Pct.Var = 3.0)

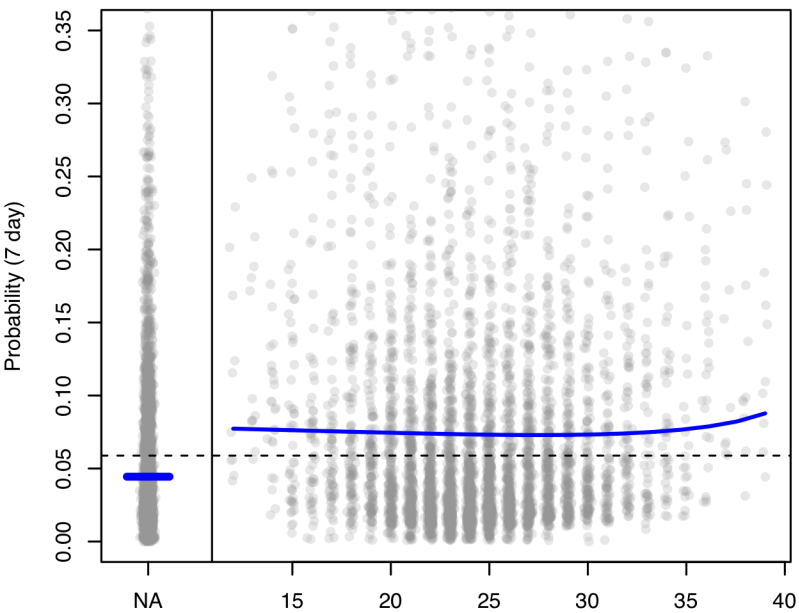

BaseDeficit (Pct.Var = 3.0)

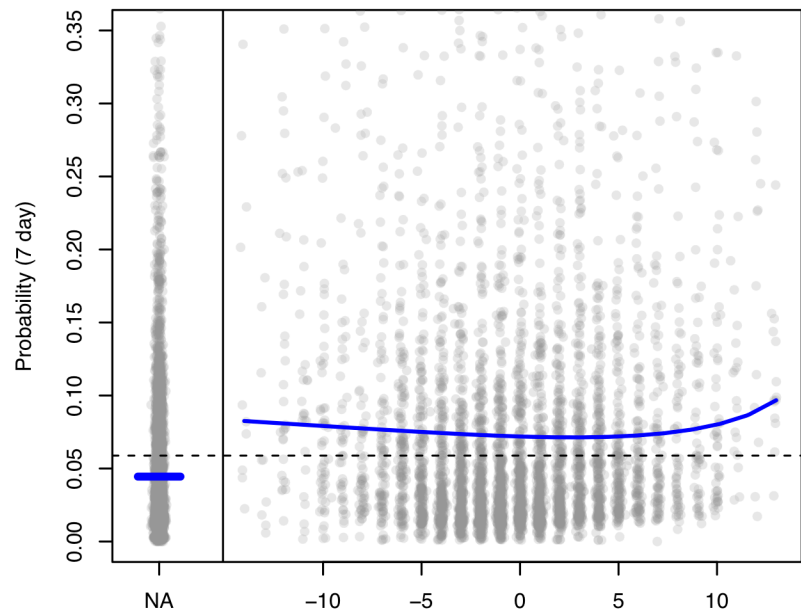

pHArterialBloodGas (Pct.Var = 2.6)

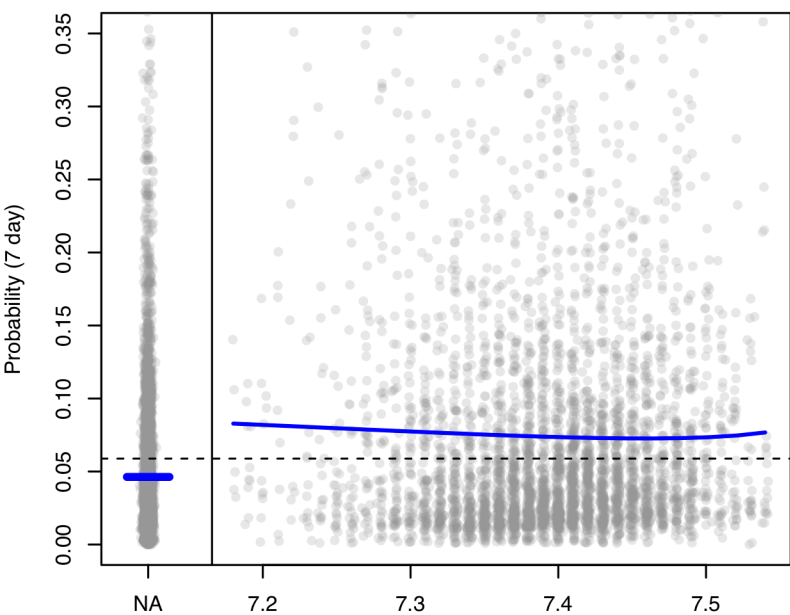

PartPressureArterialCO2 (Pct.Var = 2.5)

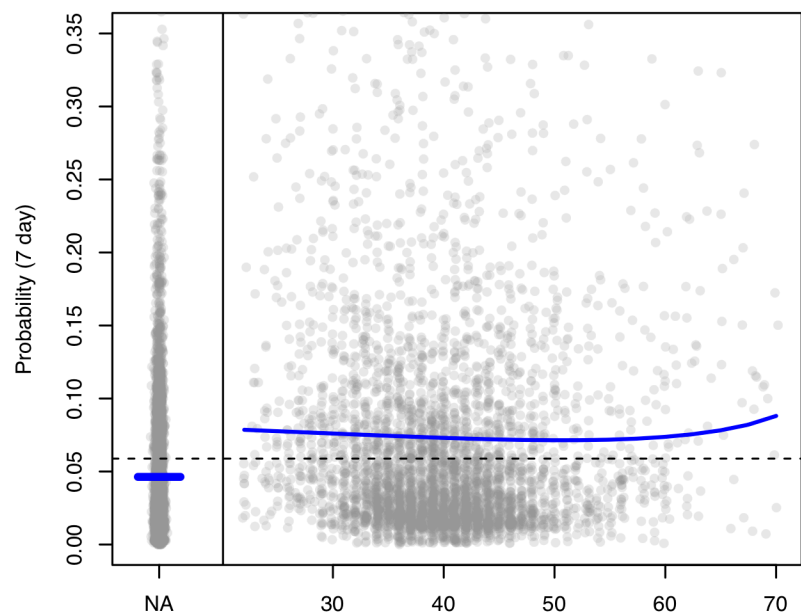

adt.icu\_12mnth (Pct.Var = 2.3)

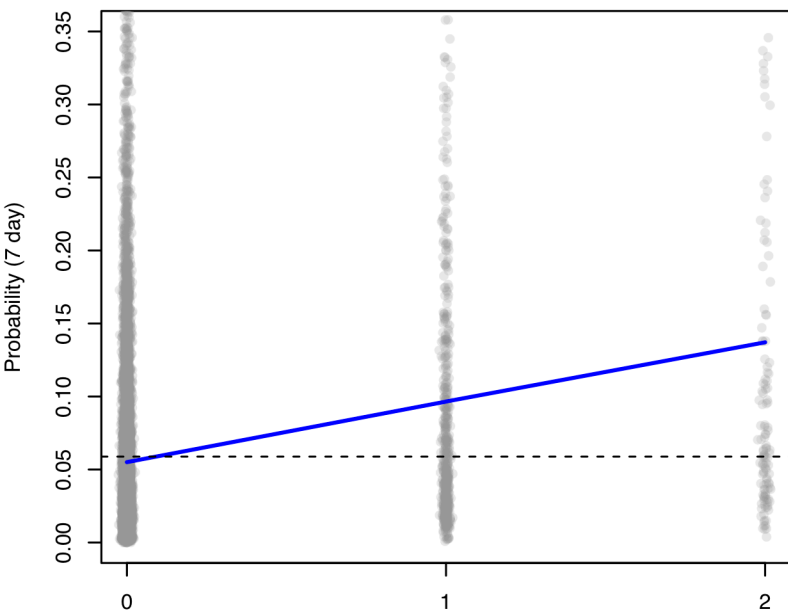

Lung\_and\_Other\_Severe\_Cancers (Pct.Var = 2.0)

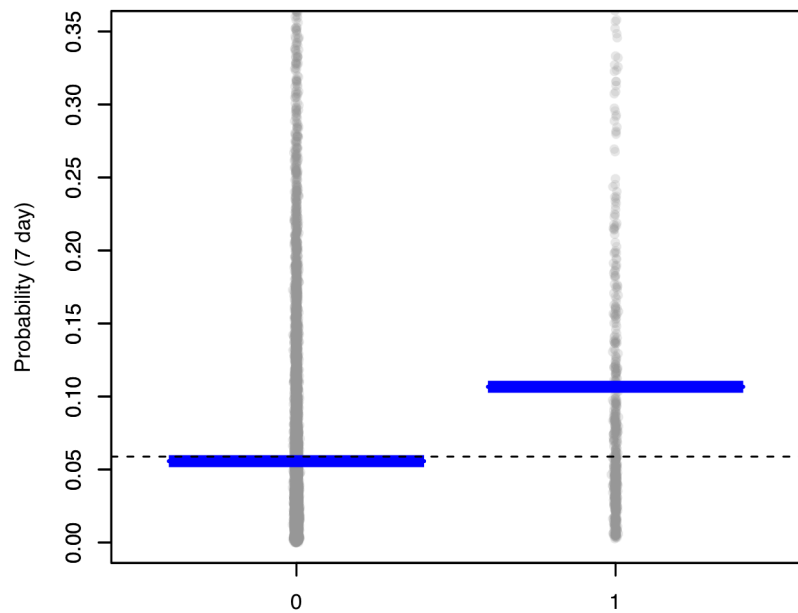

adt.icu\_6mnth (Pct.Var = 1.7)

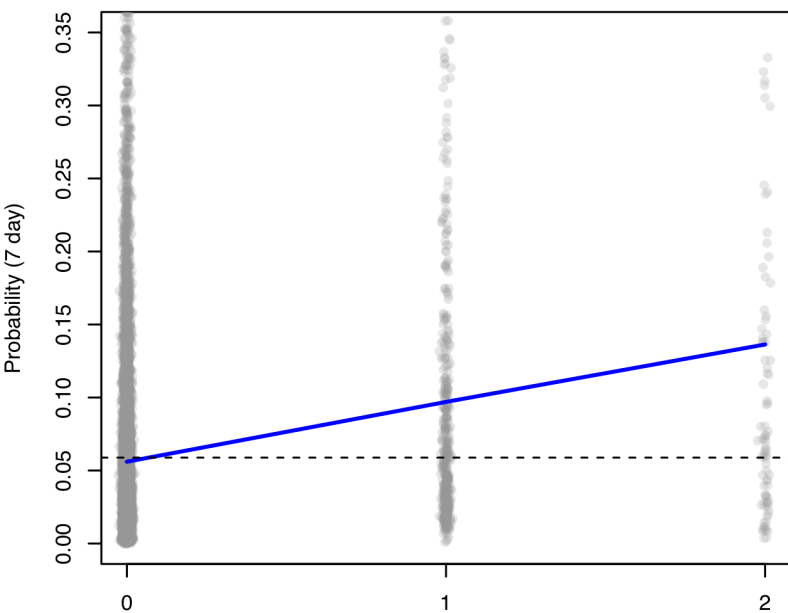

APTT (Pct.Var = 1.7)

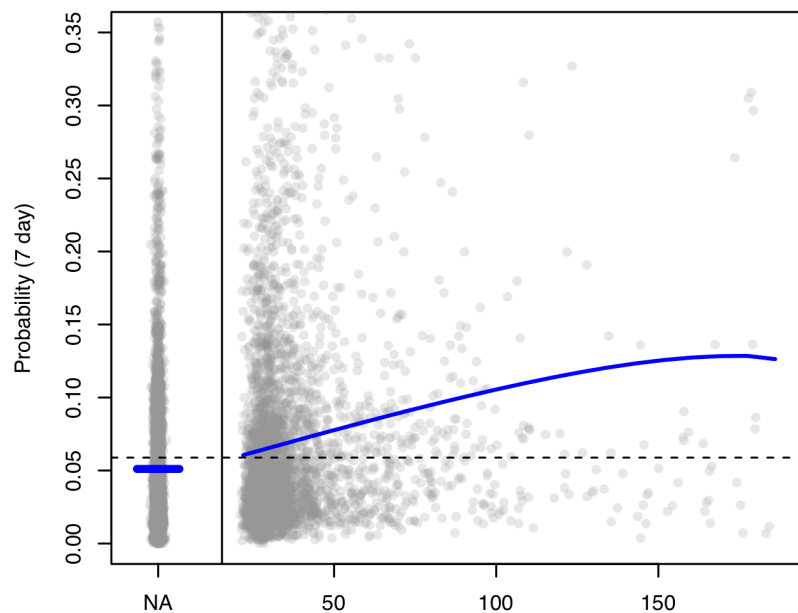

cameFrom (Pct.Var = 1.5)

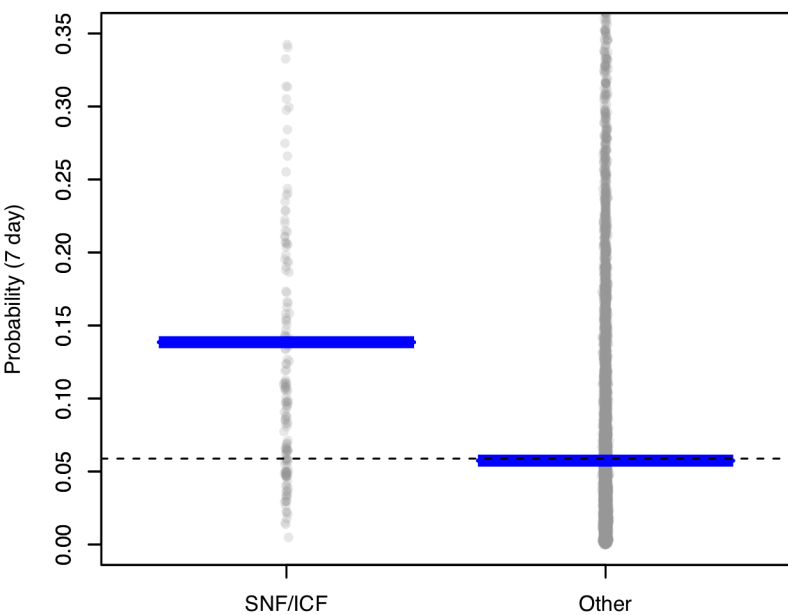

Lipase (Pct.Var = 1.3)

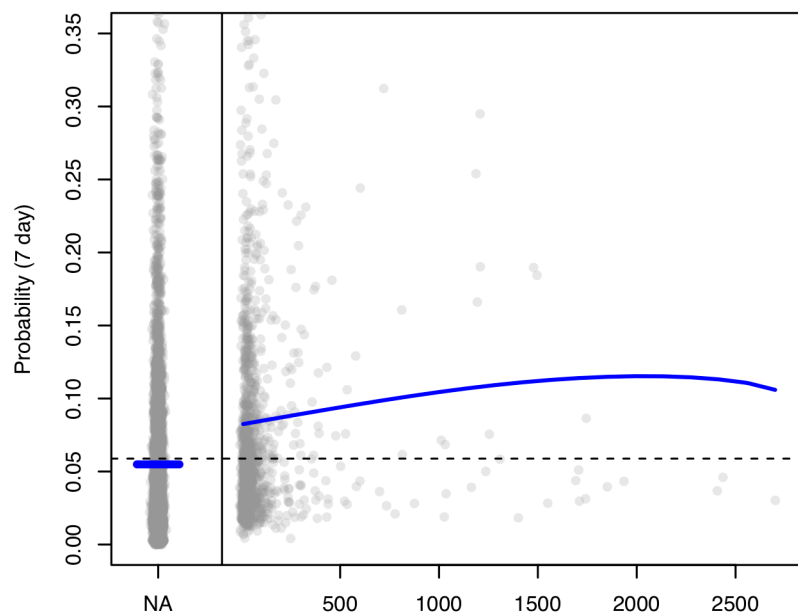

community (Pct.Var = 1.1)

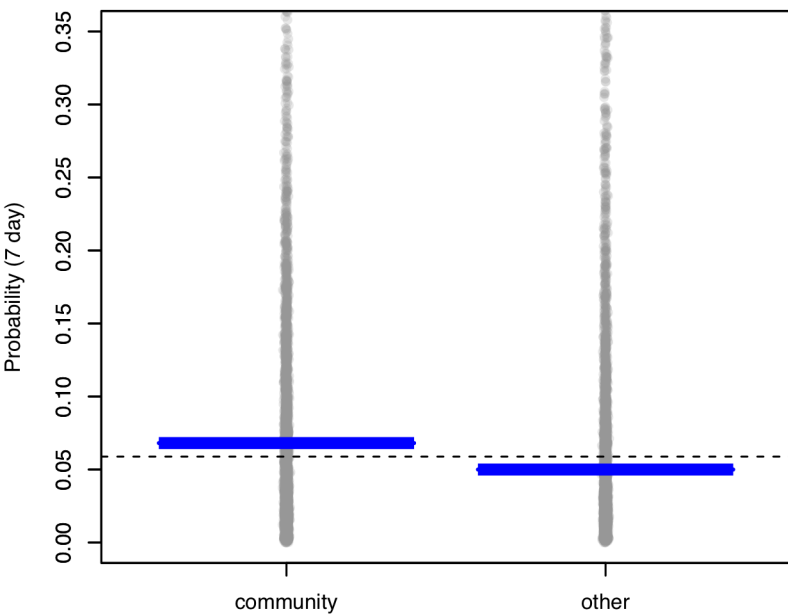

Pressure\_Pre\_Ulcer\_Skin\_Changes\_or\_Unspecified\_Stage (Pct.Var

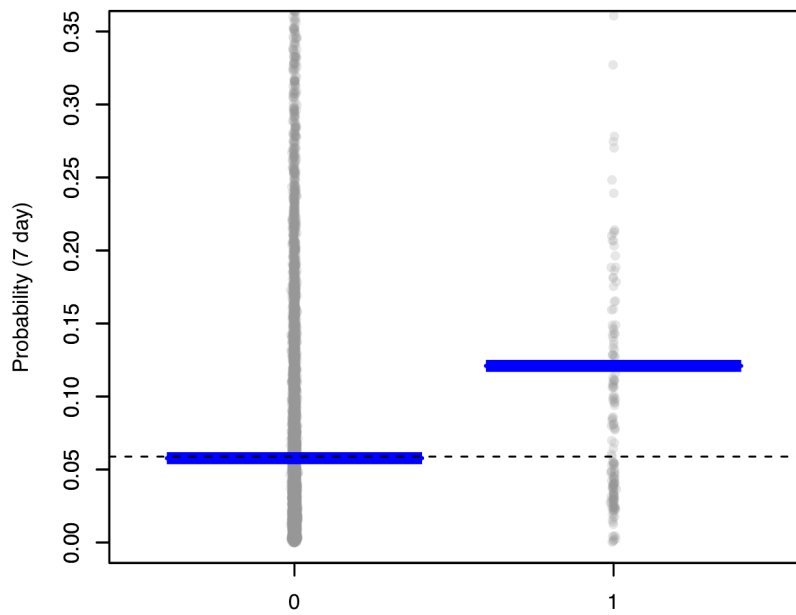

emia\_Sepsis\_Systemic\_Inflammatory\_Response\_Syndrome\_Shock (

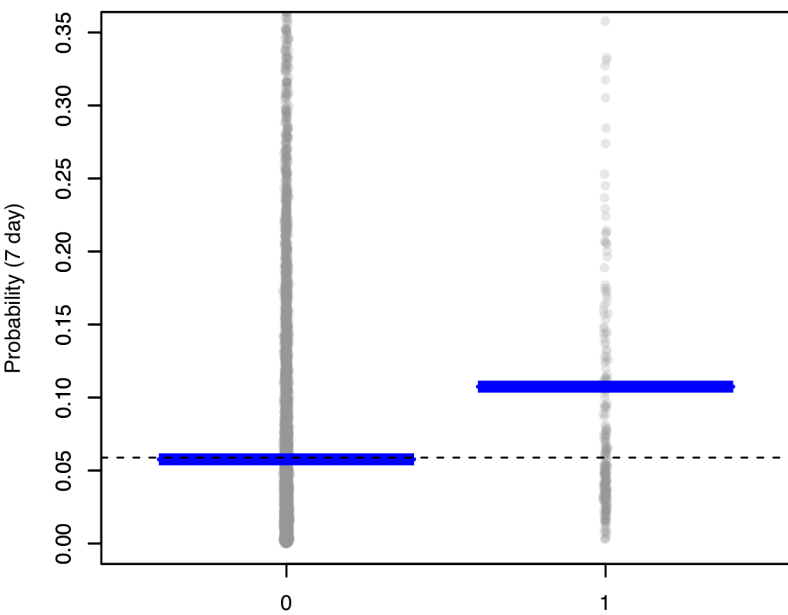

Congestive\_Heart\_Failure (Pct.Var = 0.8)

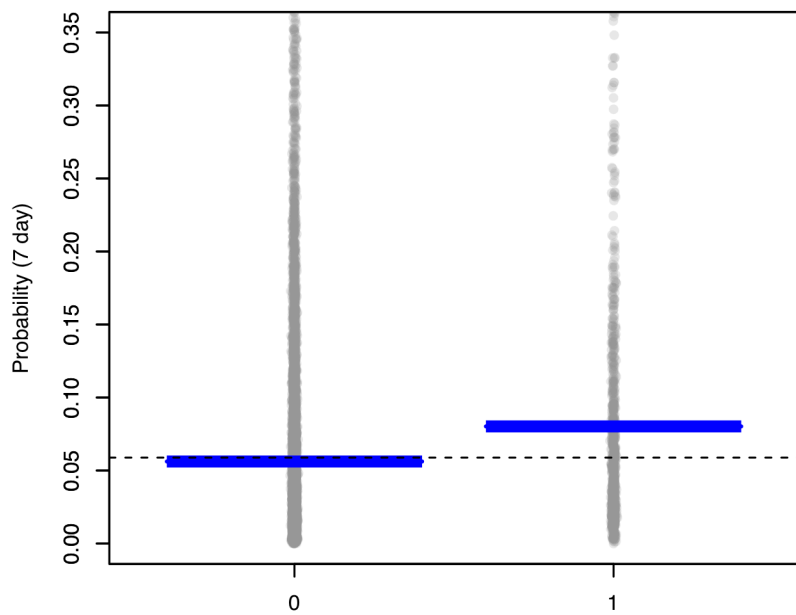

Aspiration\_and\_Specified\_Bacterial\_Pneumonias (Pct.Var = 0.7)

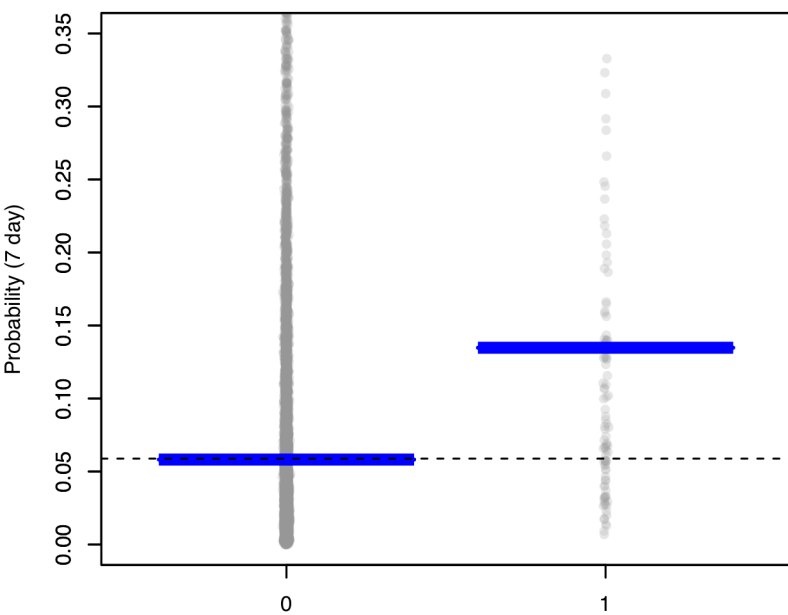

Specified\_Heart\_Arrhythmias (Pct.Var = 0.6)

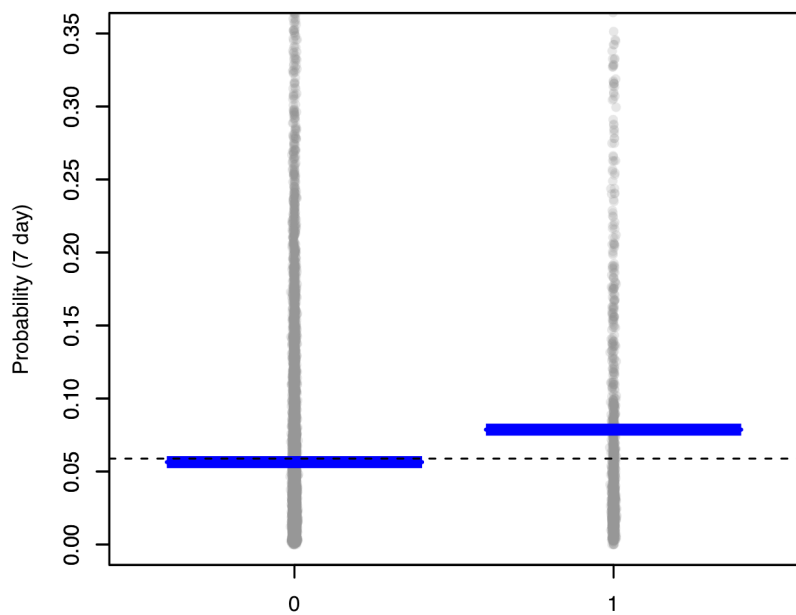

Disorders\_of\_Immunity (Pct.Var = 0.6)

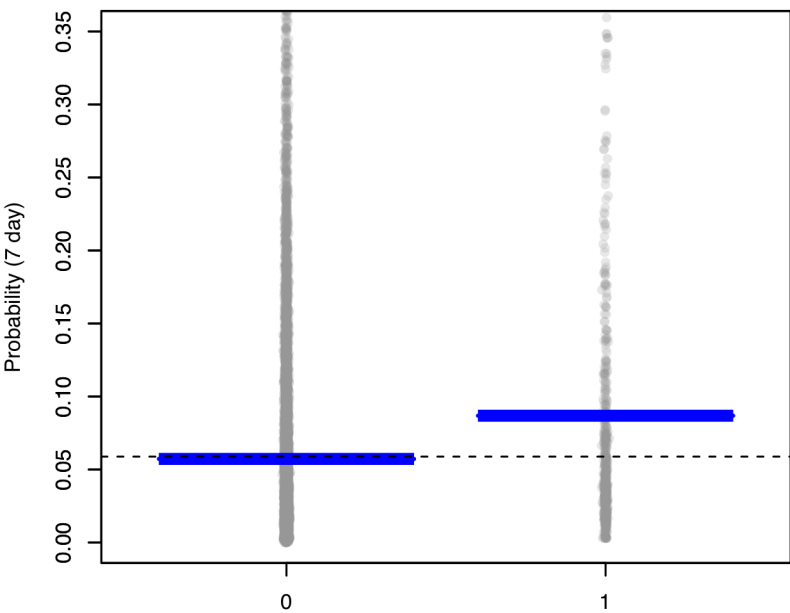

Acute\_Renal\_Failure (Pct.Var = 0.6)

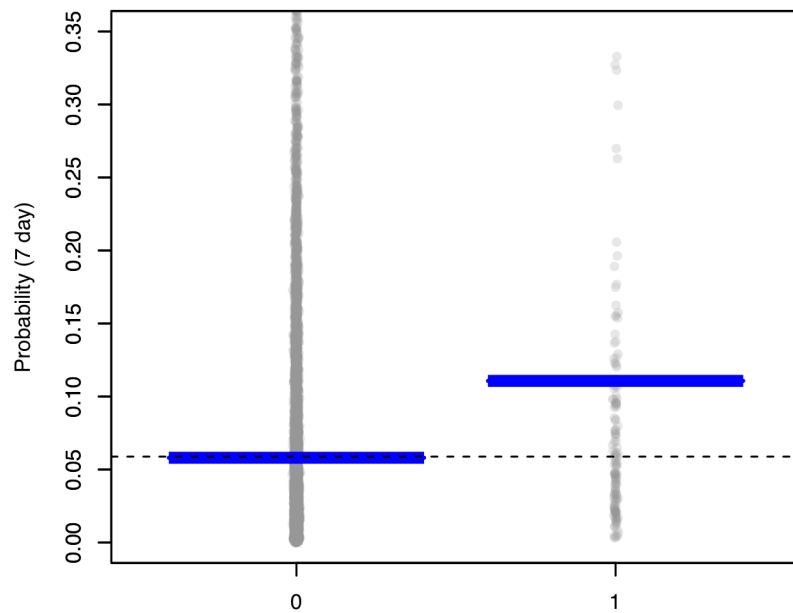

Cardio\_Respiratory\_Failure\_and\_Shock (Pct.Var = 0.5)

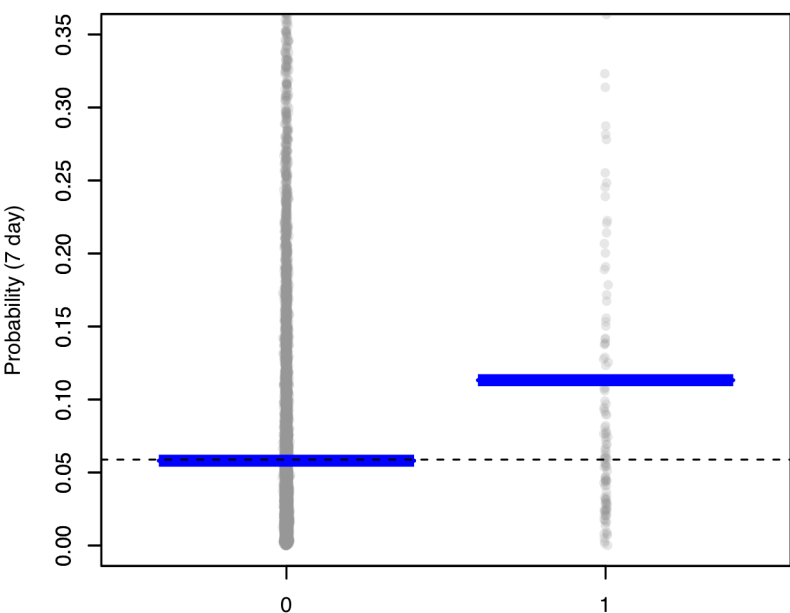

Dementia\_Without\_Complication (Pct.Var = 0.5)

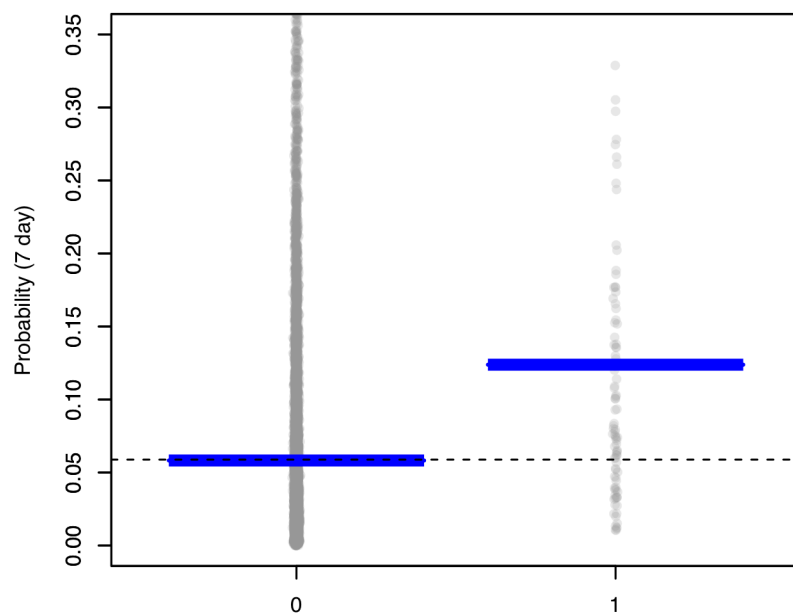

Chronic\_Kidney\_Disease\_Severe\_Stage\_4 (Pct.Var = 0.5)

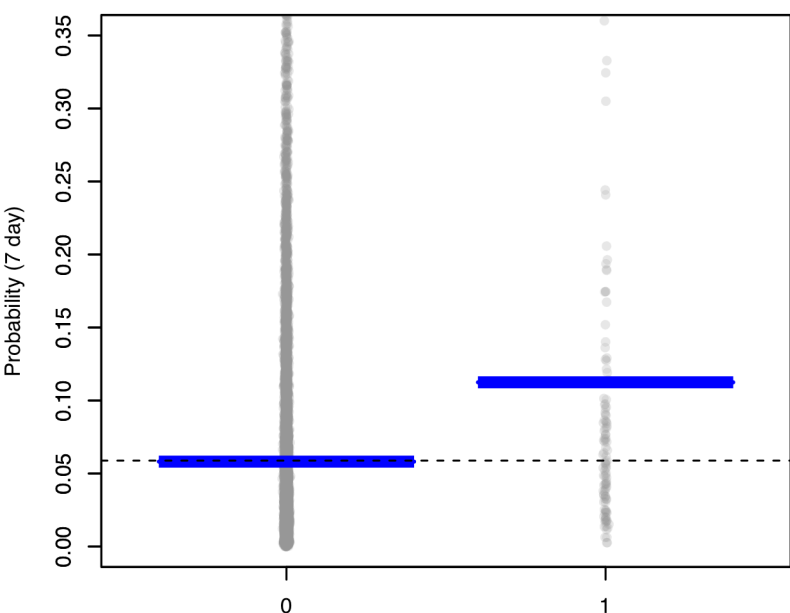

Pressure\_Ulcer\_of\_Skin\_with\_Full\_Thickness\_Skin\_Loss (Pct.Var = 0.5)

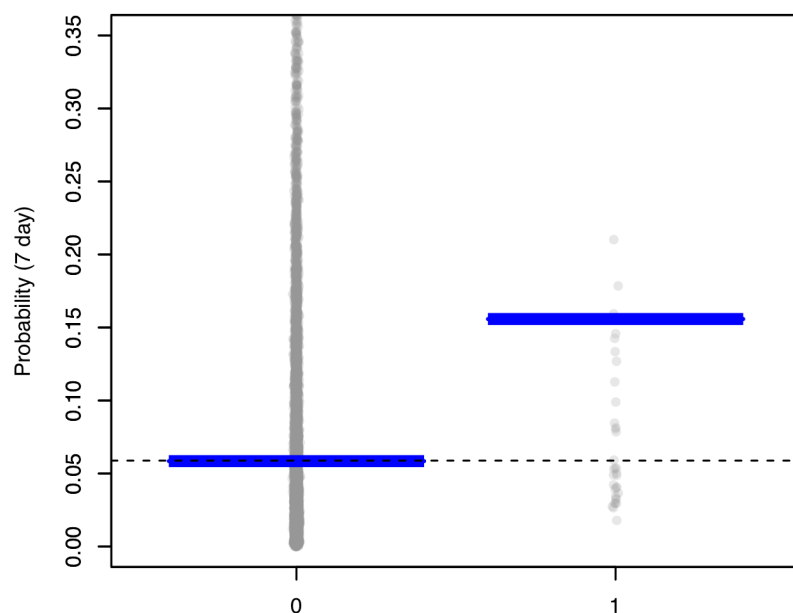

Chronic\_Ulcer\_of\_Skin\_Except\_Pressure (Pct.Var = 0.4)

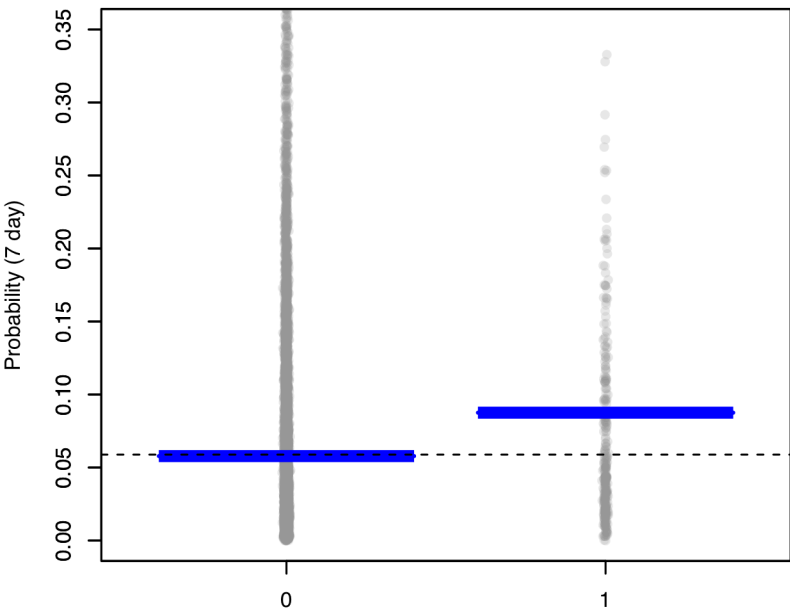

Hip\_Fracture\_Dislocation (Pct.Var = 0.4)

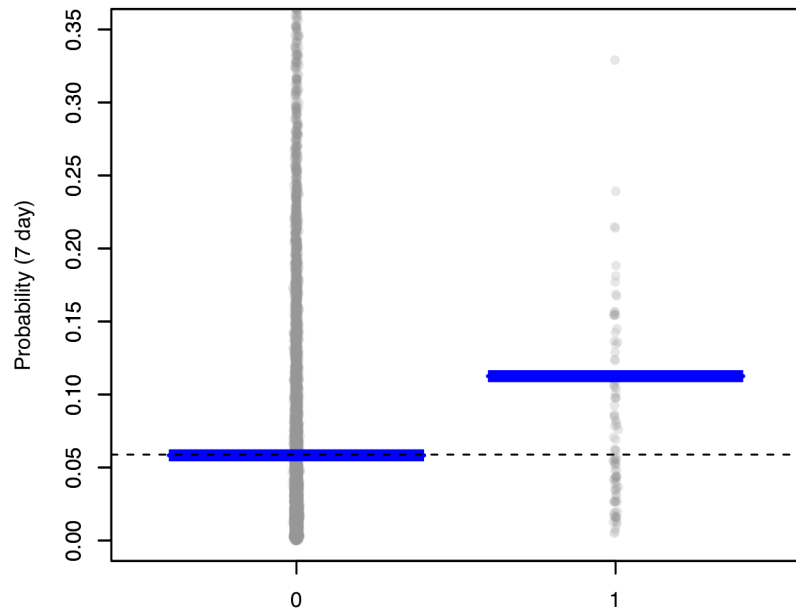

Chronic\_Obstructive\_Pulmonary\_Disease (Pct.Var = 0.3)

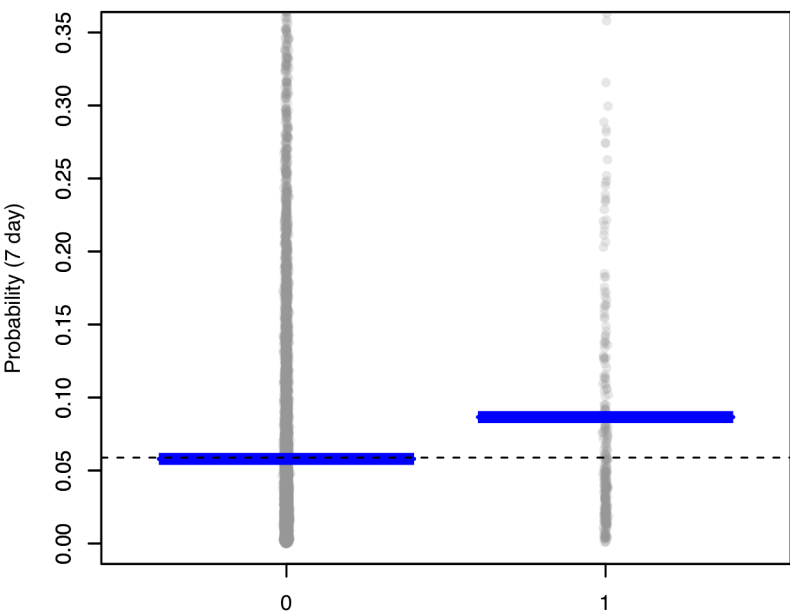

Acute\_Myocardial\_Infarction (Pct.Var = 0.3)

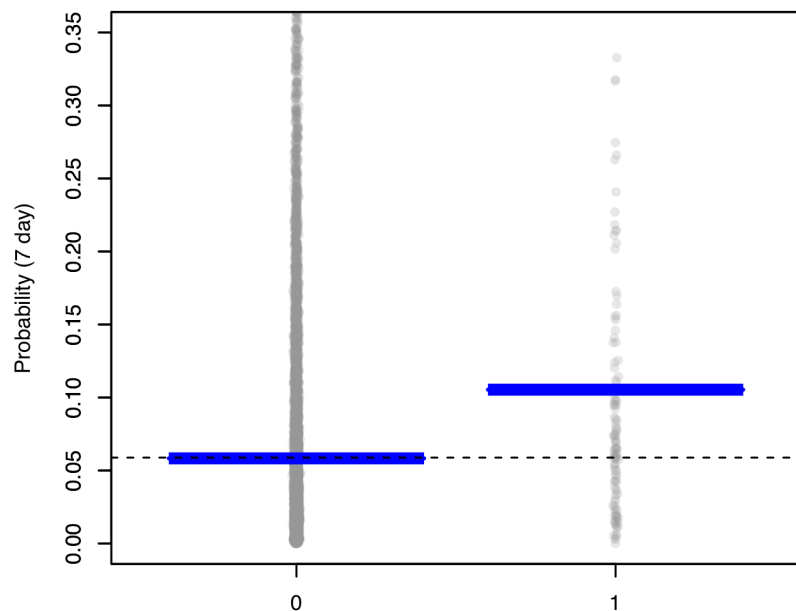

Amylase (Pct.Var = 0.3)

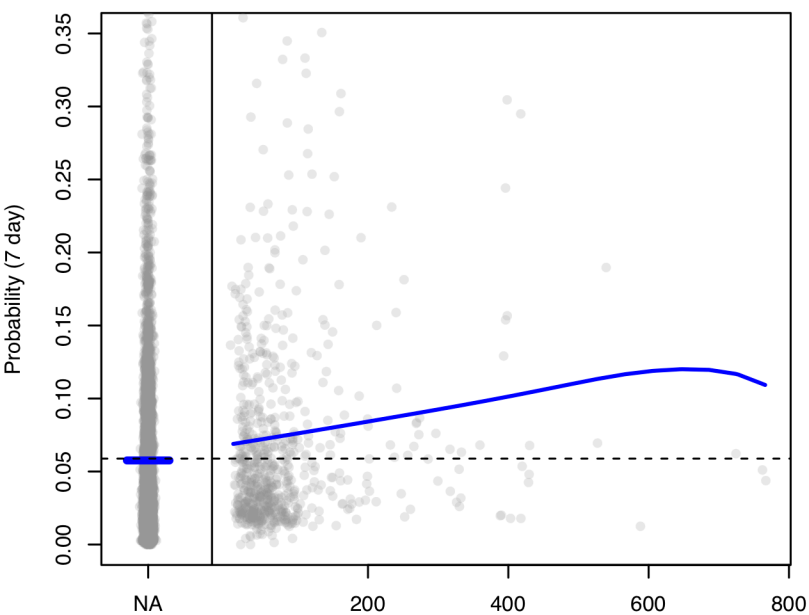

Diabetes\_with\_Chronic\_Complications (Pct.Var = 0.3)

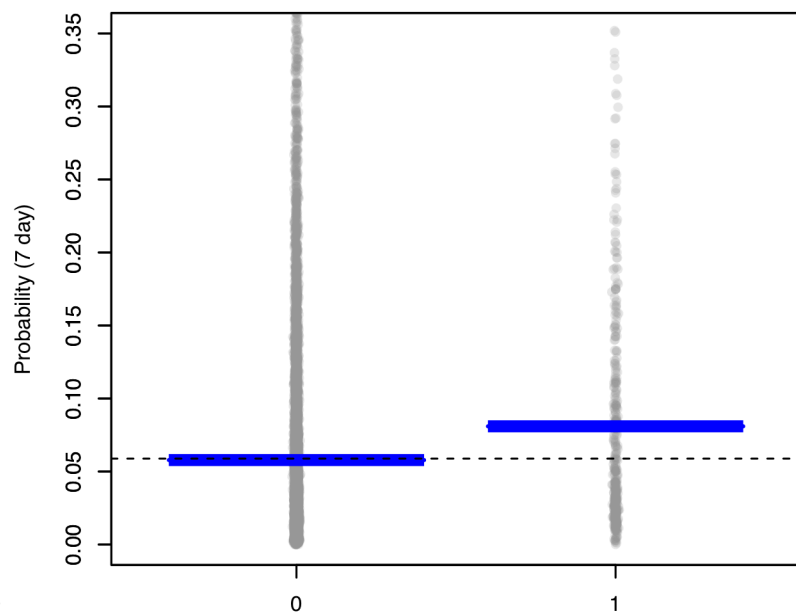

Chronic\_Kidney\_Disease\_Stage\_5 (Pct.Var = 0.3)

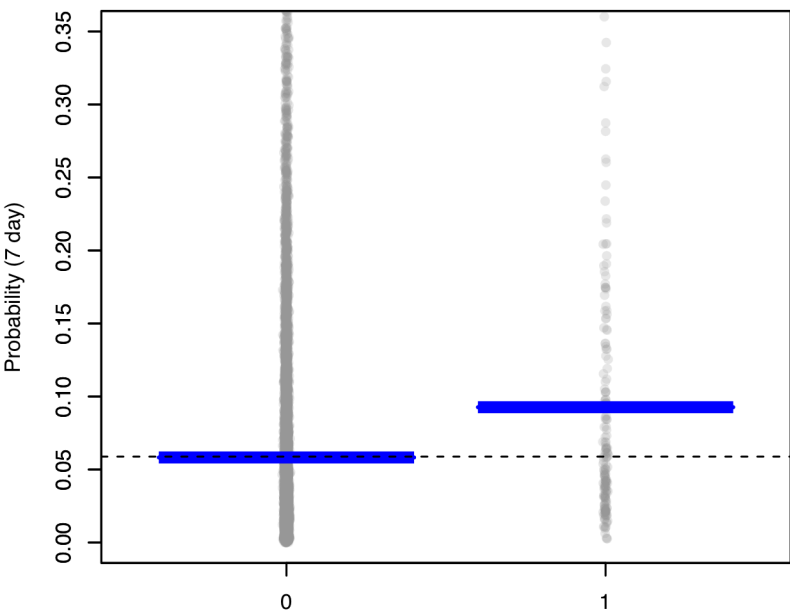

End\_Stage\_Liver\_Disease (Pct.Var = 0.3)

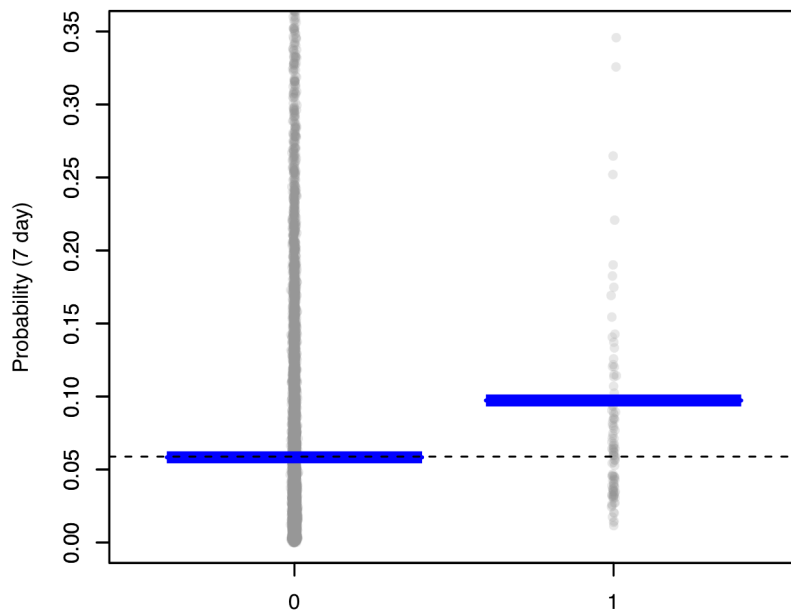

Vascular\_Disease\_with\_Complications (Pct.Var = 0.2)

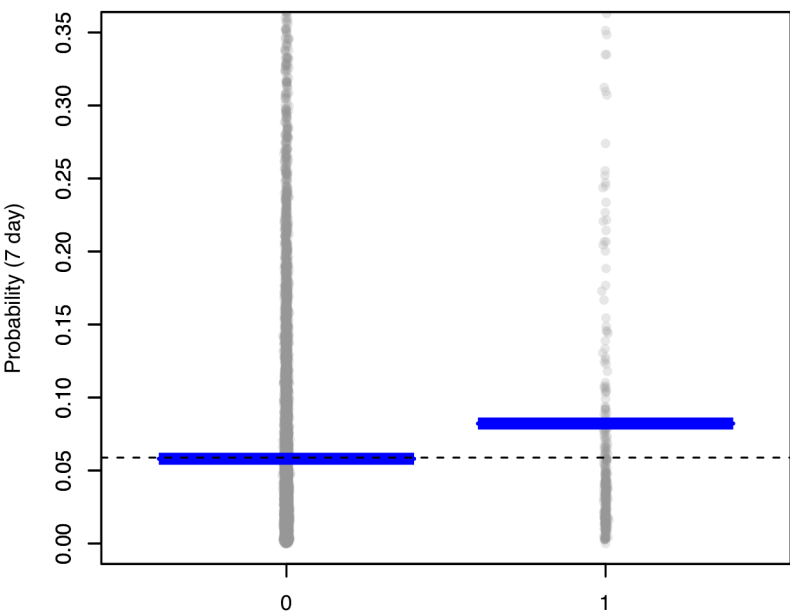

Chronic\_Kidney\_Disease\_Moderate\_Stage\_3 (Pct.Var = 0.2)

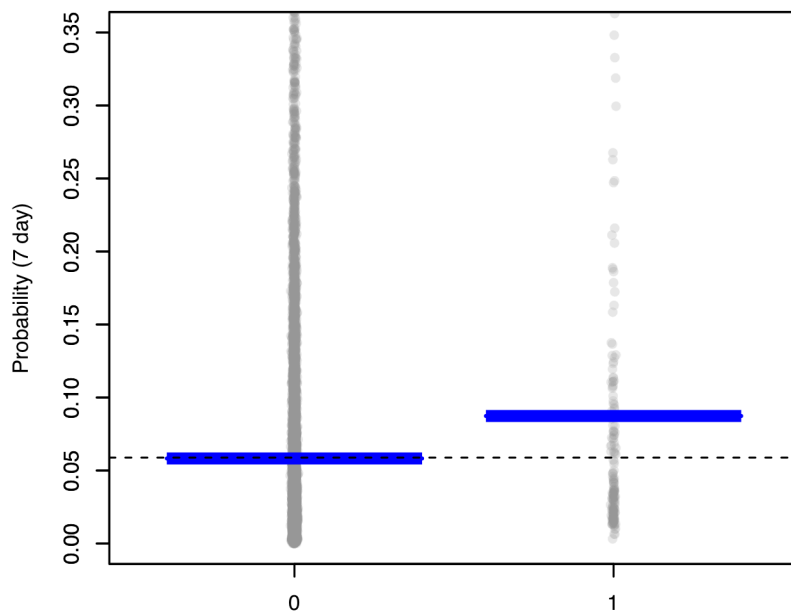

Lymphoma\_and\_Other\_Cancers (Pct.Var = 0.2)

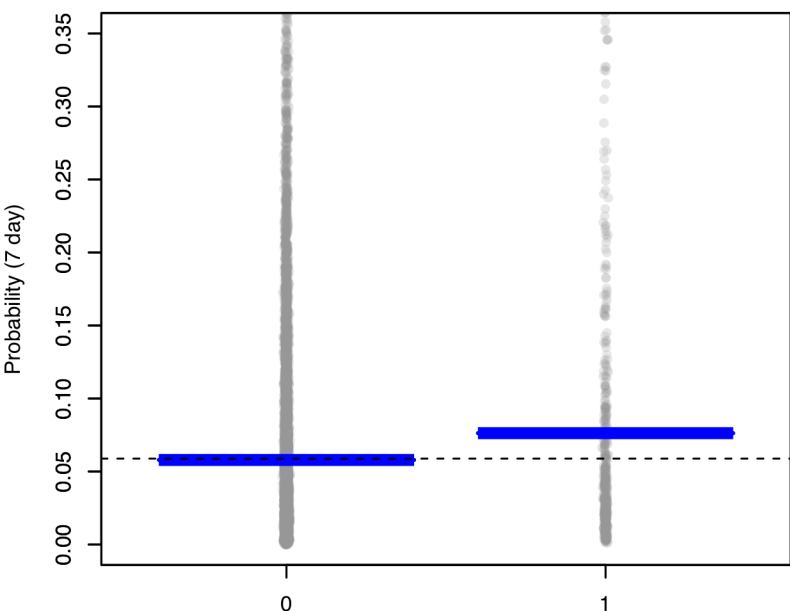

Opportunistic\_Infections (Pct.Var = 0.2)

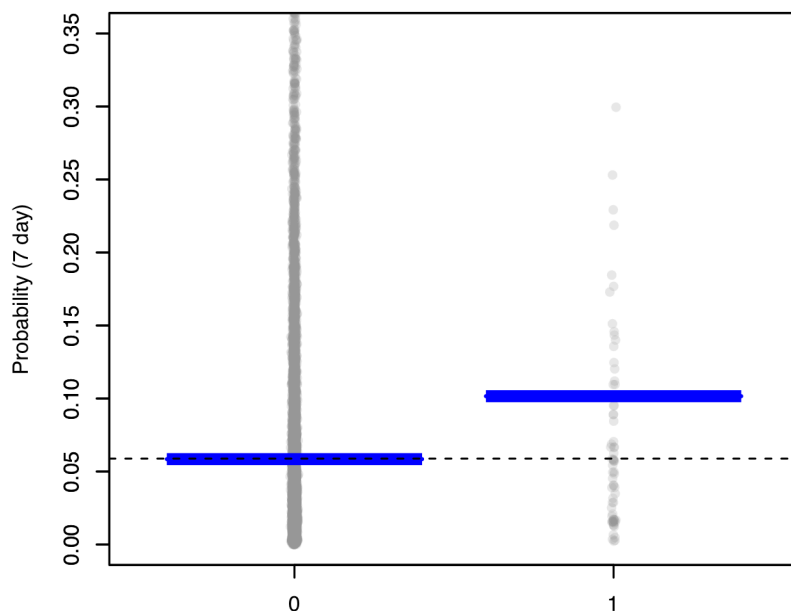

therosclerosis\_of\_the\_Extremities\_with\_Ulceration\_or\_Gangrene (Pct. Var = 0.2) Pneumococcal\_Pneumonia\_Empyema\_Lung\_Abscess (Pct. Var = 0.2)

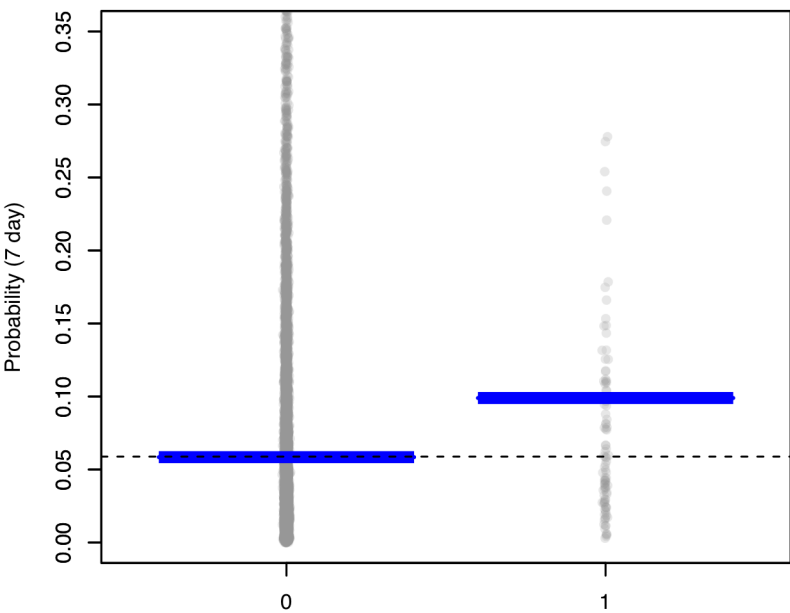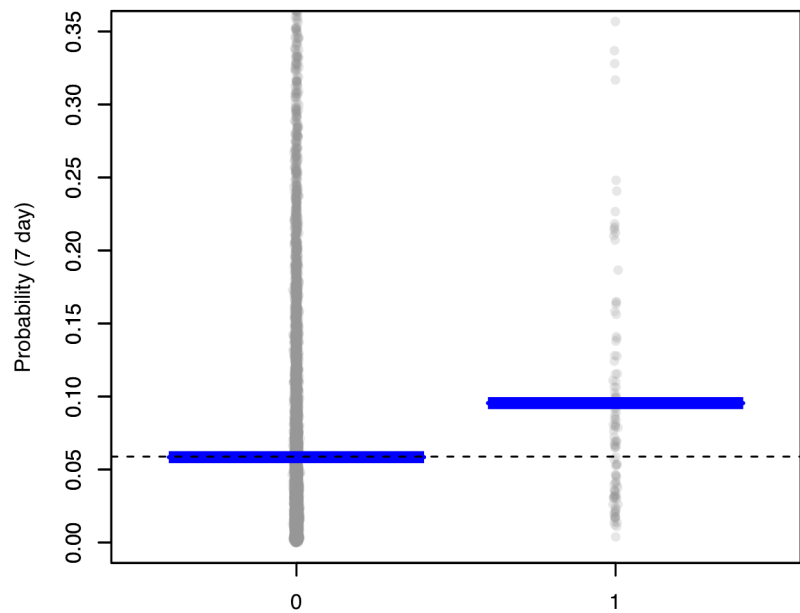

ulation\_Defects\_and\_Other\_Specified\_Hematological\_Disorders (Pct. Kidney\_Disease\_Mild\_or\_Unspecified\_Stages\_1\_2\_or\_Unspecified

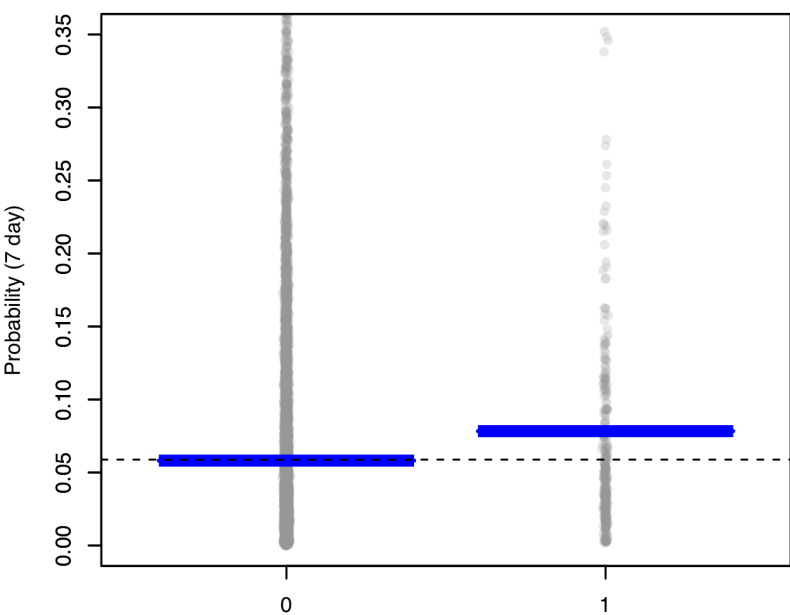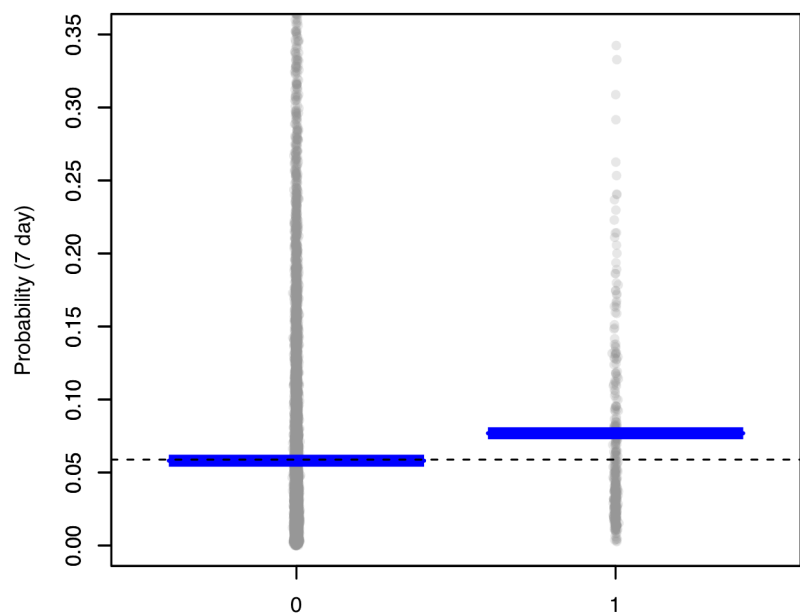

Vertebral\_Fractures\_without\_Spinal\_Cord\_Injury (Pct. Var = 0.2)

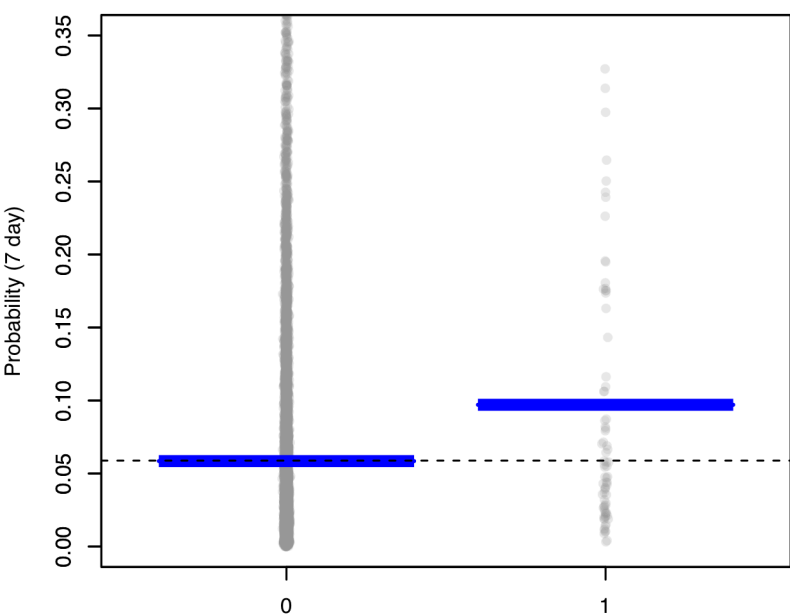

Severe\_Hematological\_Disorders (Pct. Var = 0.2)

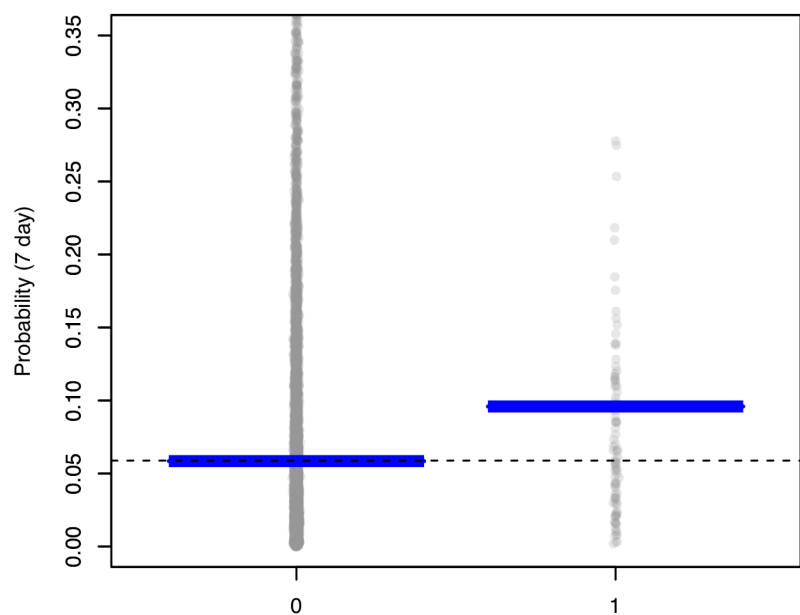

Protein\_Calorie\_Malnutrition (Pct.Var = 0.2)

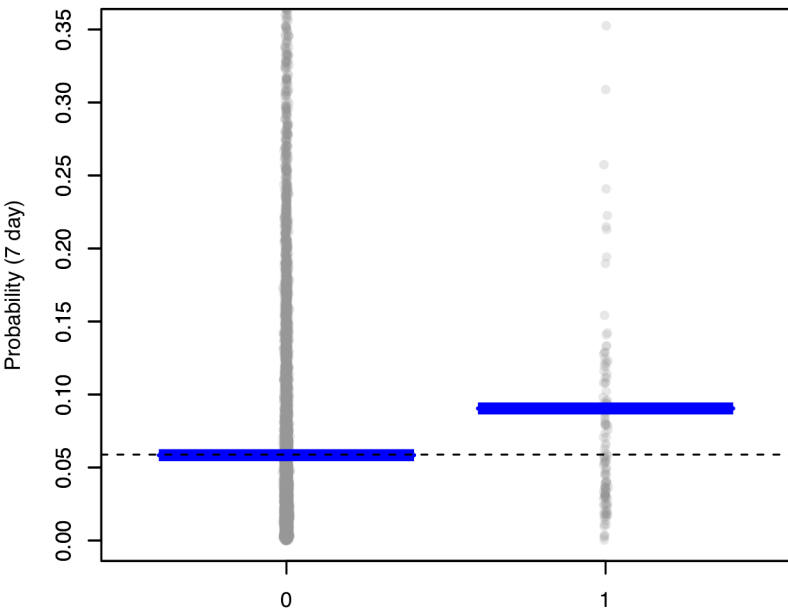

Dialysis\_Status (Pct.Var = 0.2)

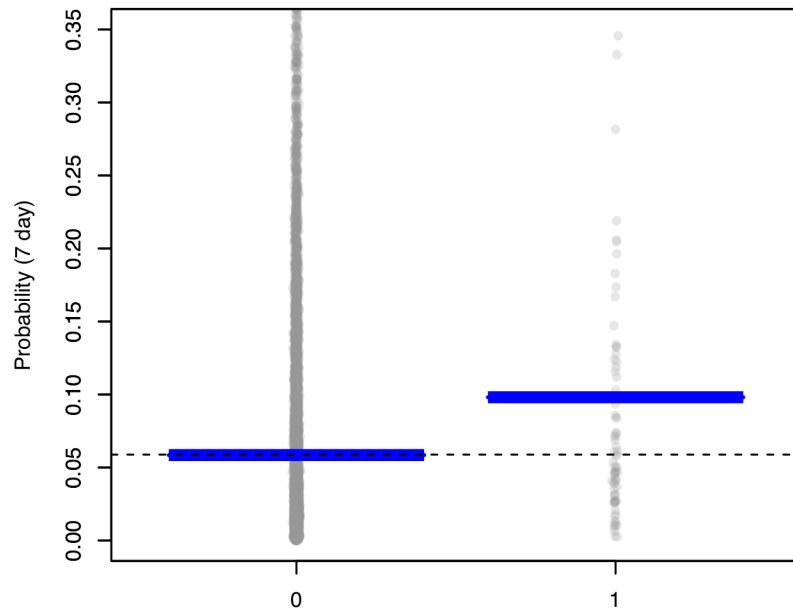

Cirrhosis\_of\_Liver (Pct.Var = 0.2)

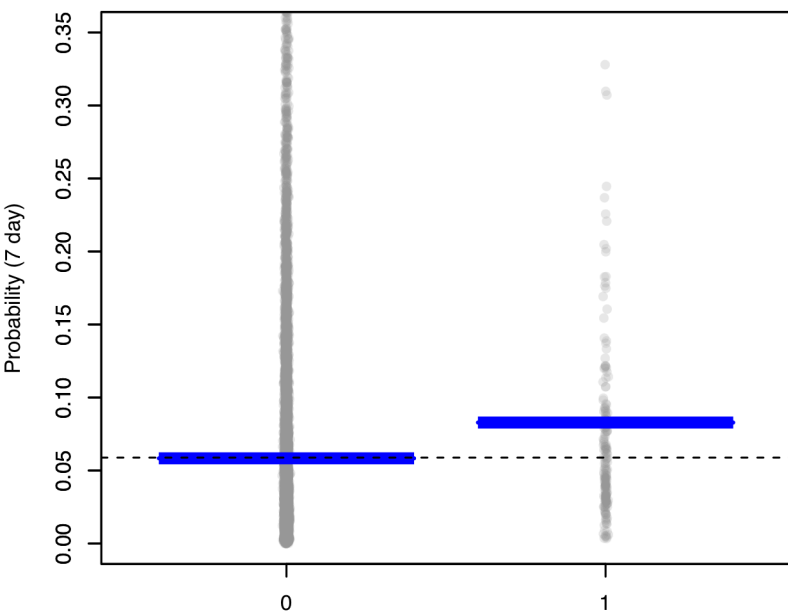

Pressure\_Ulcer\_of\_Skin\_with\_Partial\_Thickness\_Skin\_Loss (Pct.Var = 0.2)

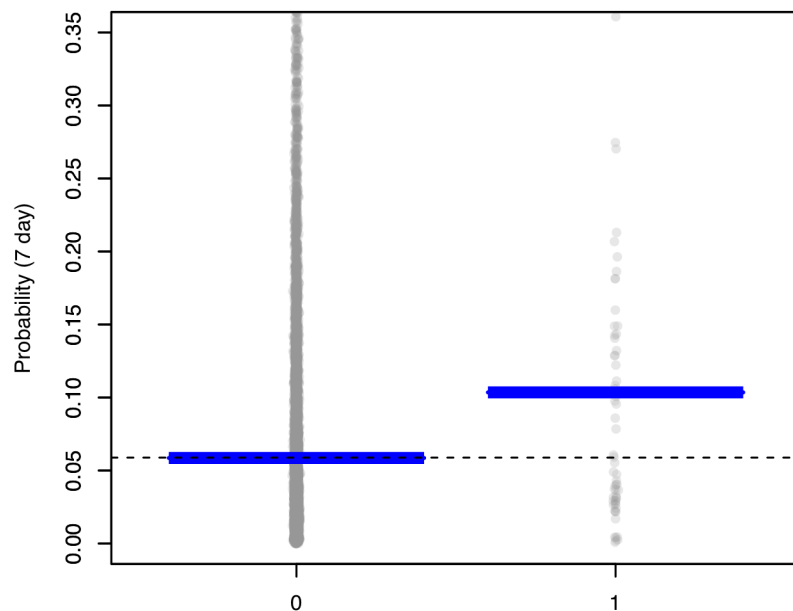

Intestinal\_Obstruction\_Perforation (Pct.Var = 0.1)

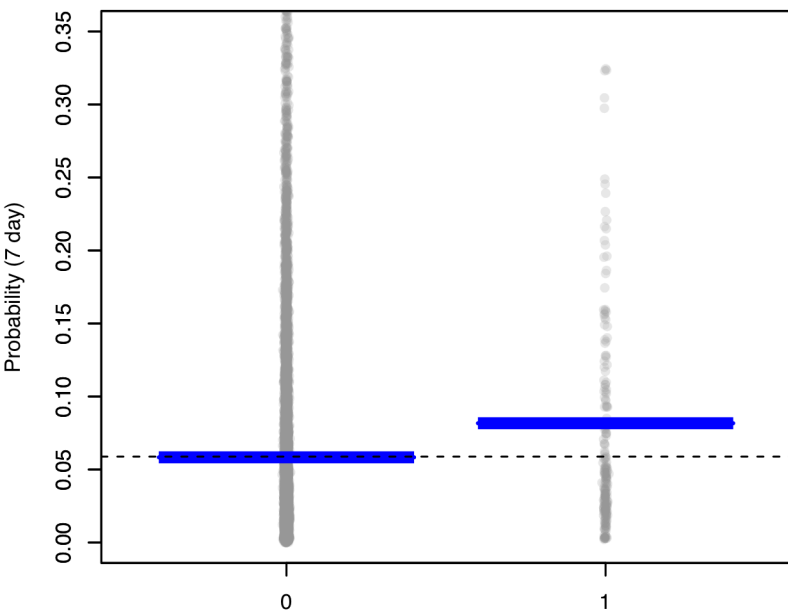

Polyneuropathy (Pct.Var = 0.1)

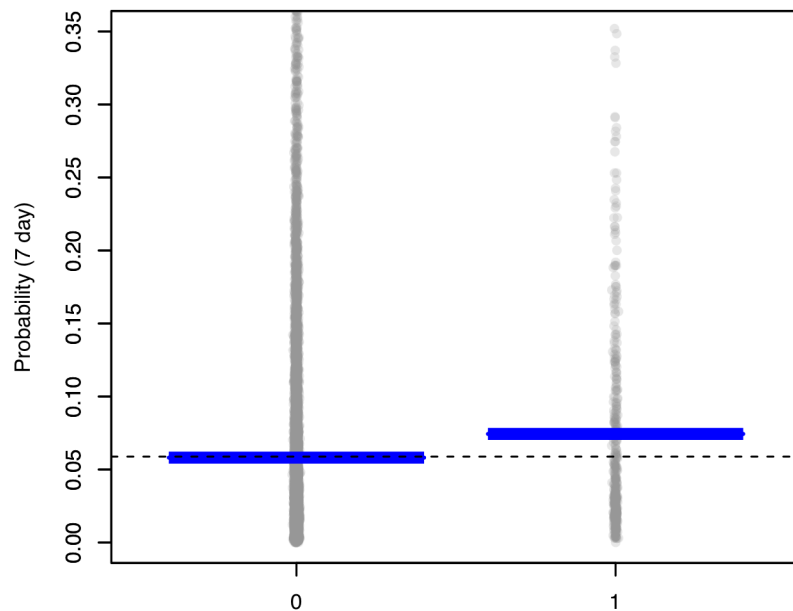



Nephritis (Pct.Var = 0.1)

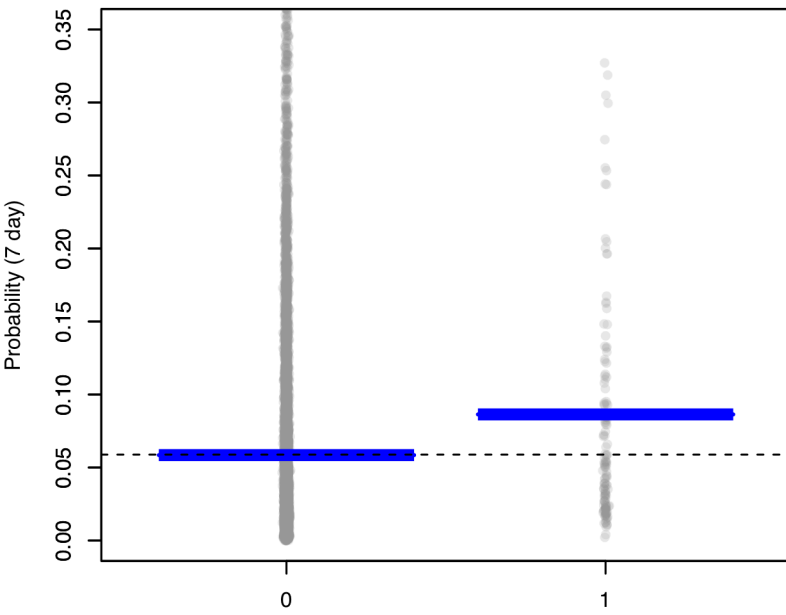

Fibrinogen (Pct.Var = 0.1)

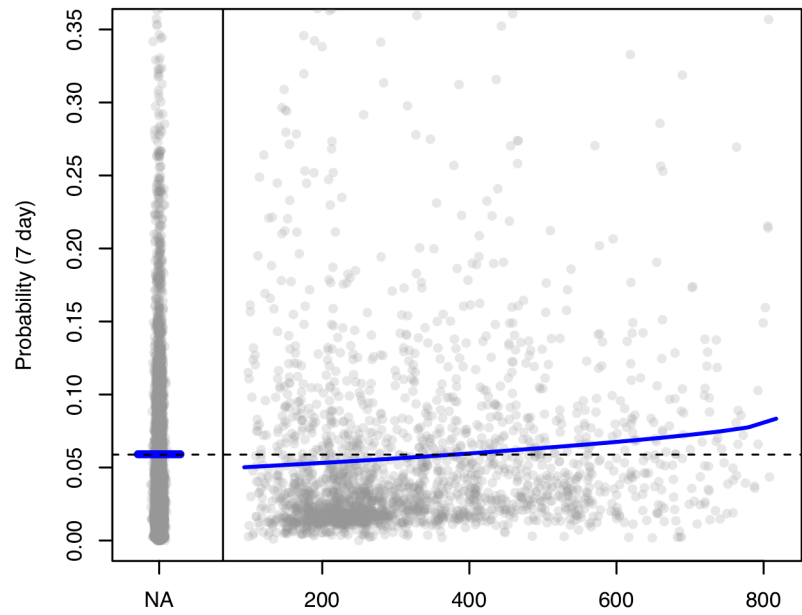

Vascular\_Disease (Pct.Var = 0.1)

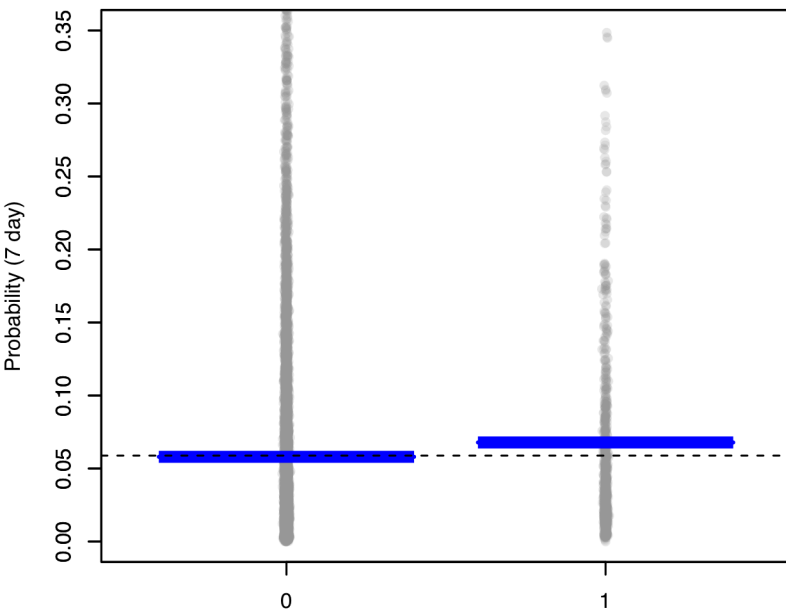

Amputation\_Status\_Lower\_Limb\_Amputation\_Complications (Pct.Var = 0.1)

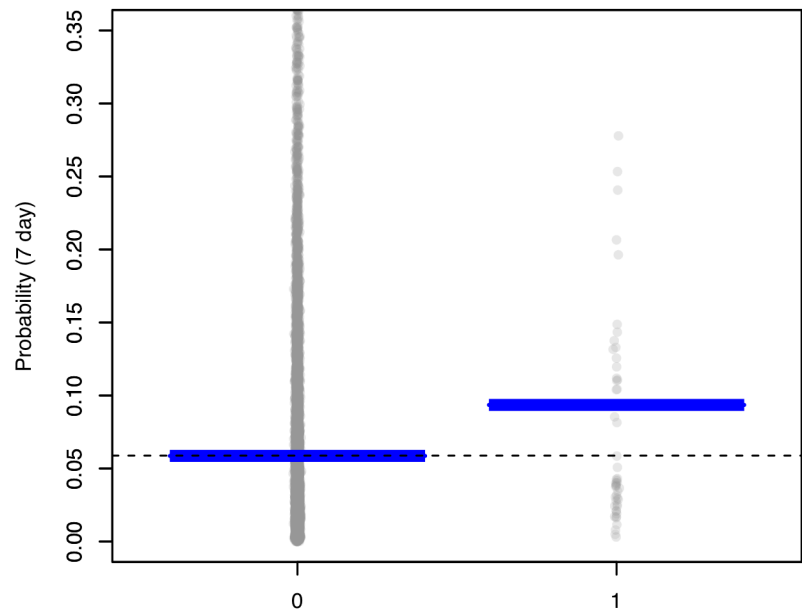

Breast\_Prostate\_and\_Other\_Cancers\_and\_Tumors (Pct.Var = 0.0)

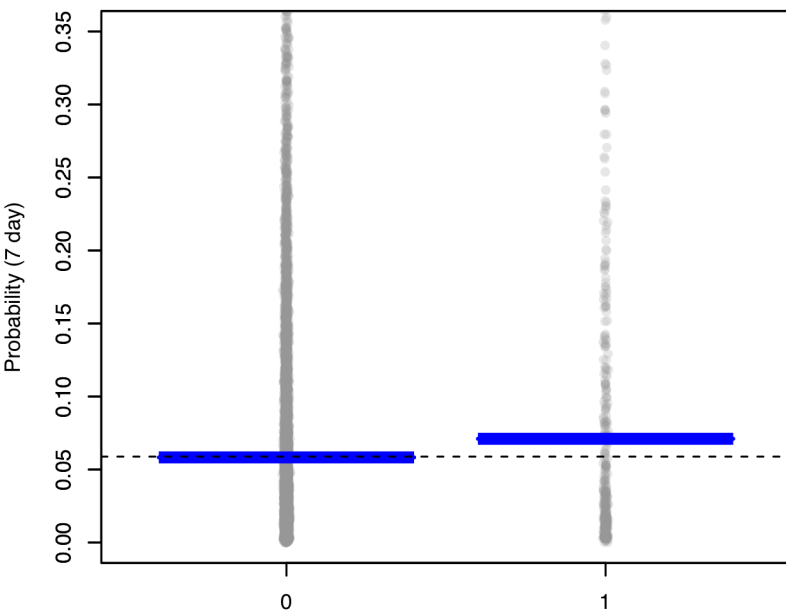

Exudative\_Macular\_Degeneration (Pct.Var = 0.1)

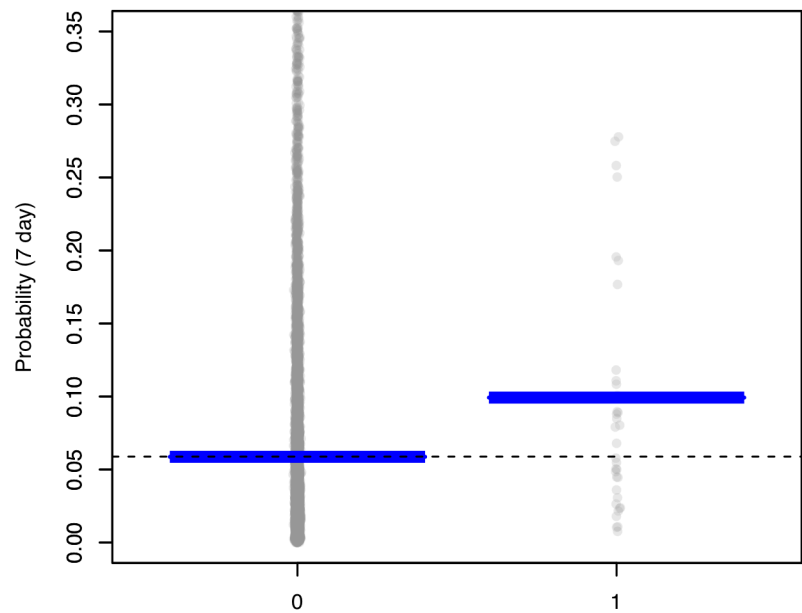

Ulcer\_of\_Skin\_with\_Necrosis\_Through\_to\_Muscle\_Tendon\_or\_Bone (Pct.Var = 0.1)      Fibrosis\_of\_Lung\_and\_Other\_Chronic\_Lung\_Disorders (Pct.Var = 0.1)

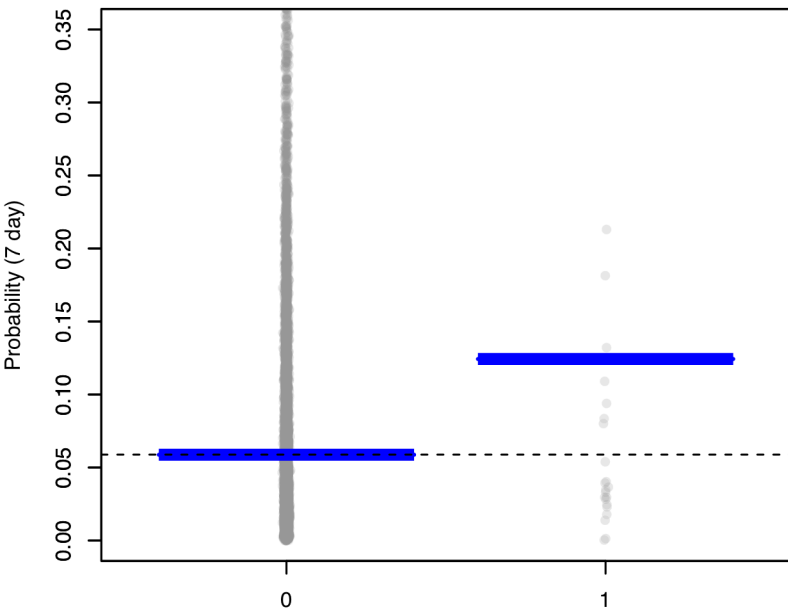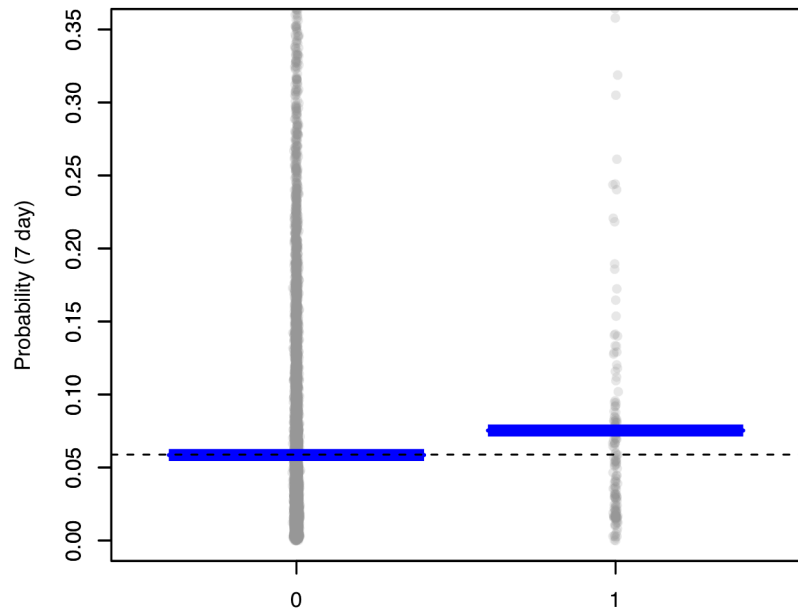

Seizure\_Disorders\_and\_Convulsions (Pct.Var = 0.1)

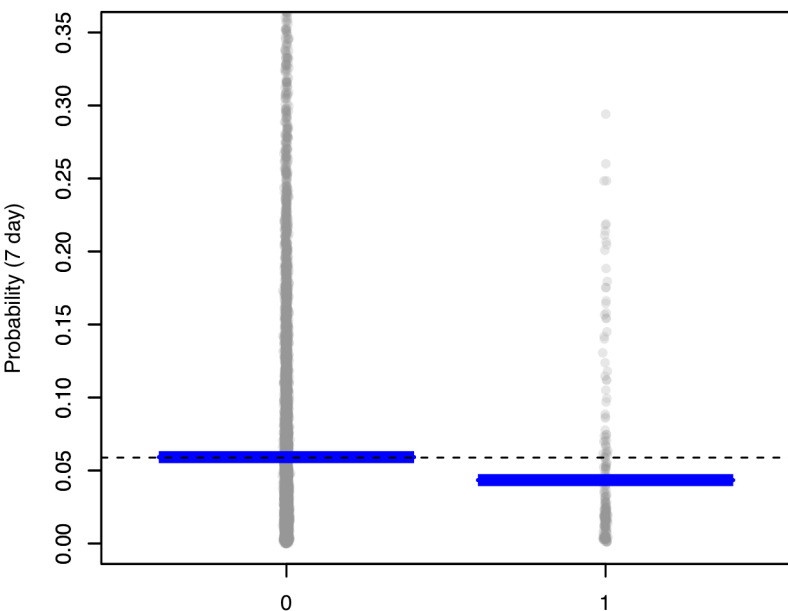

Unstable\_Angina\_and\_Other\_Acute\_Ischemic\_Heart\_Disease (Pct.Var = 0.1)

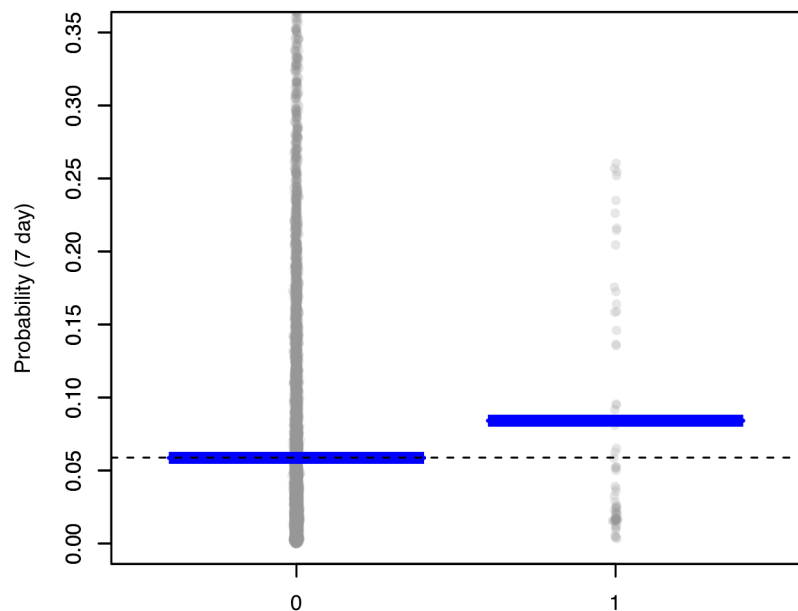

Major\_Organ\_Transplant\_or\_Replacement\_Status (Pct.Var = 0.1)      Complications\_of\_Specified\_Implanted\_Device\_or\_Graft (Pct.Var = 0.1)

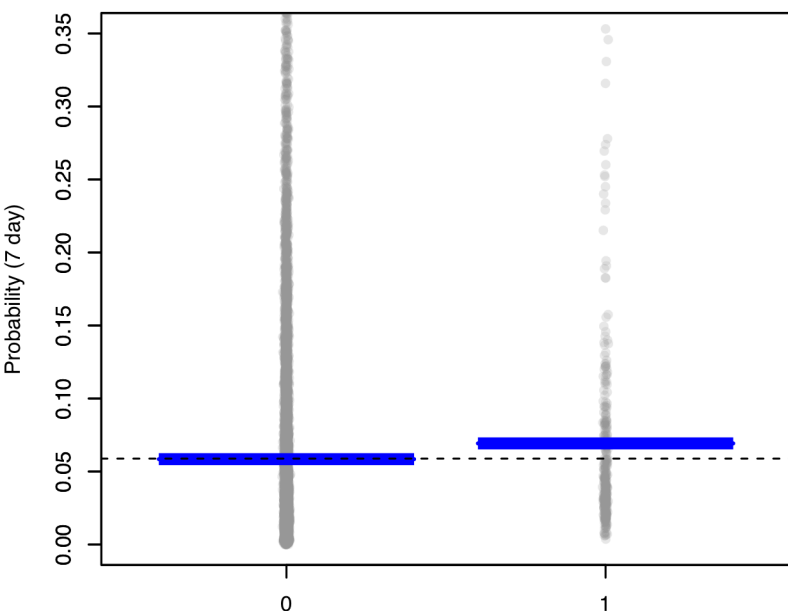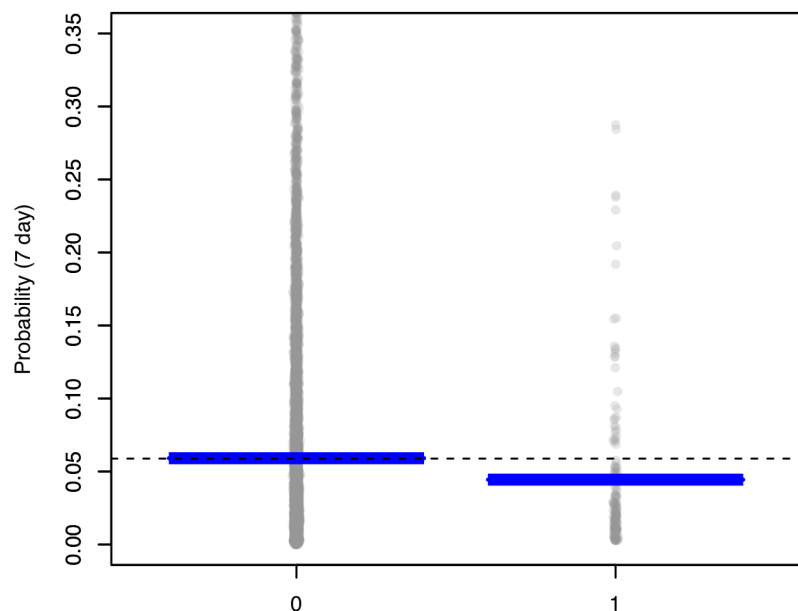

Proliferative\_Diabetic\_Retinopathy\_and\_Vitreous\_Hemorrhage (Pct.Var = 0.0)

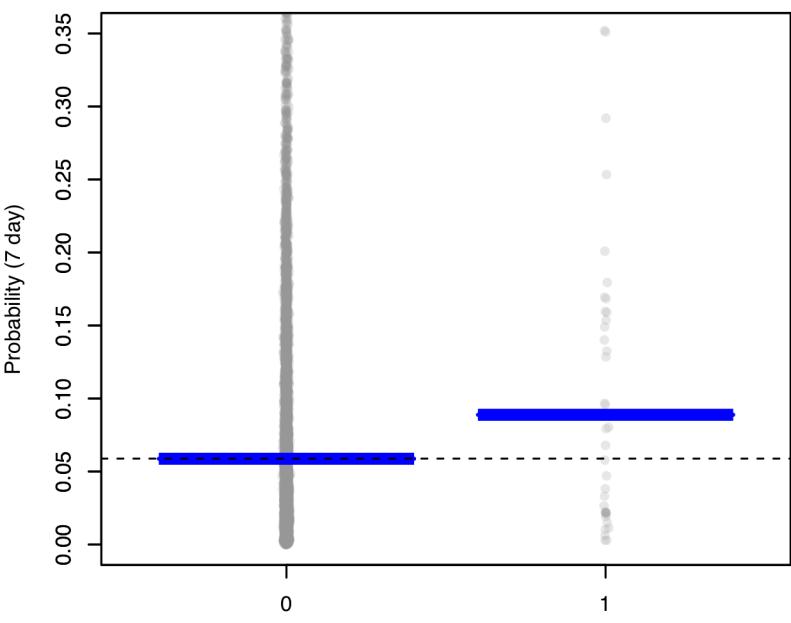

Bone\_Joint\_Muscle\_Infections\_Necrosis (Pct.Var = 0.0)

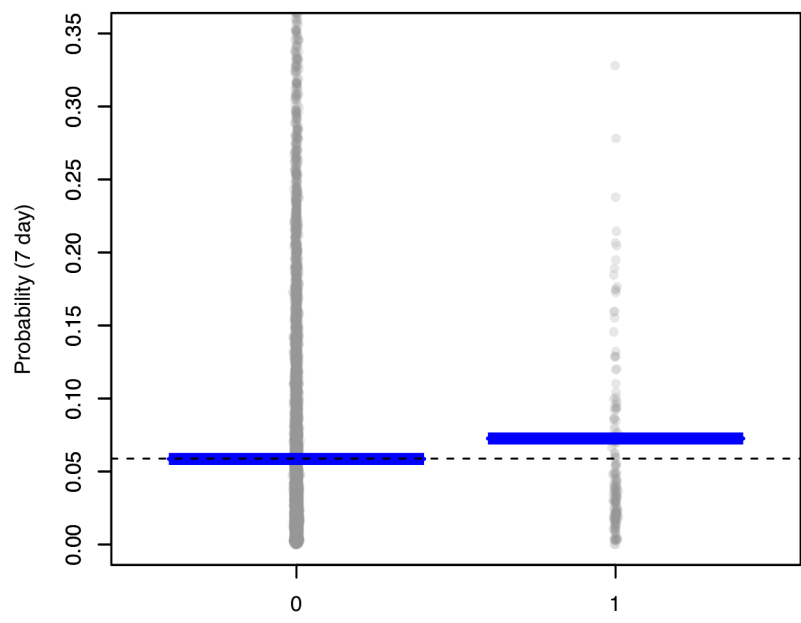

Colorectal\_Bladder\_and\_Other\_Cancers (Pct.Var = 0.0)

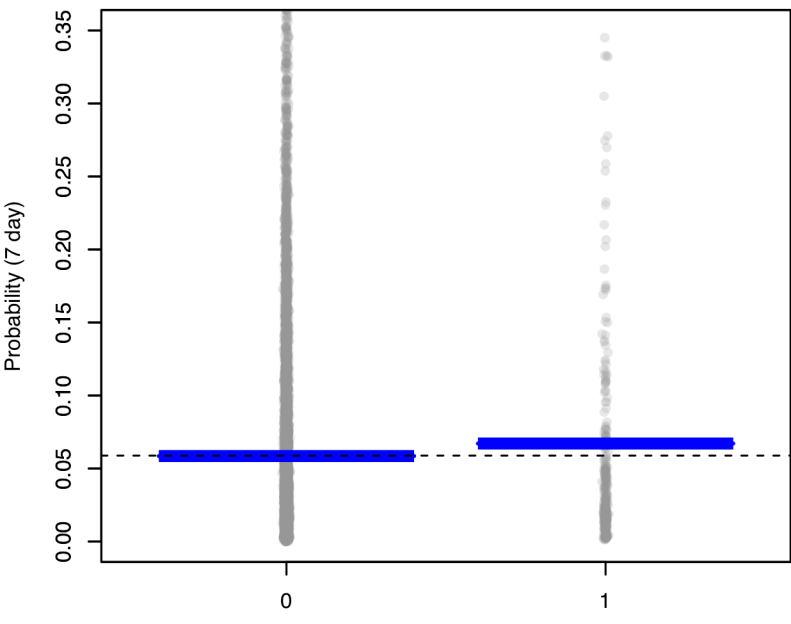

Morbid\_Obesity (Pct.Var = 0.0)

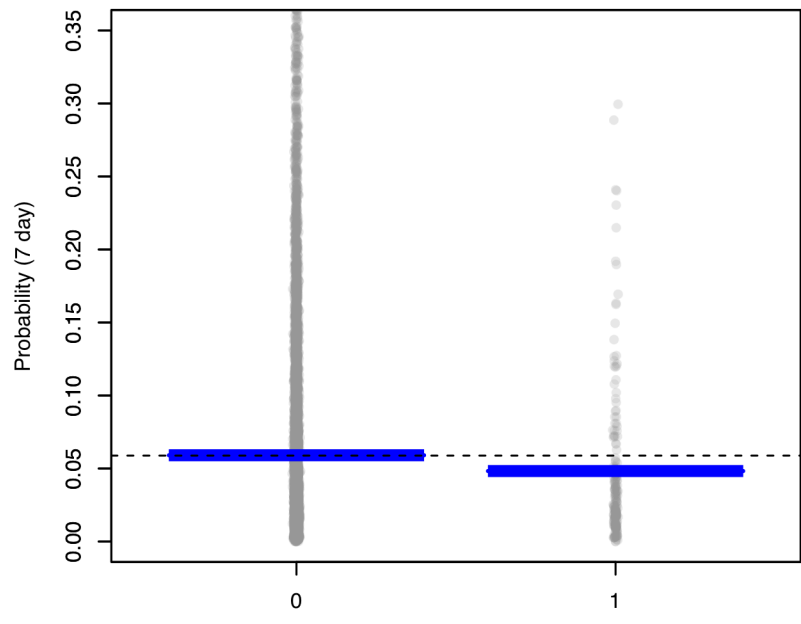

Unspecified\_Renal\_Failure (Pct.Var = 0.0)

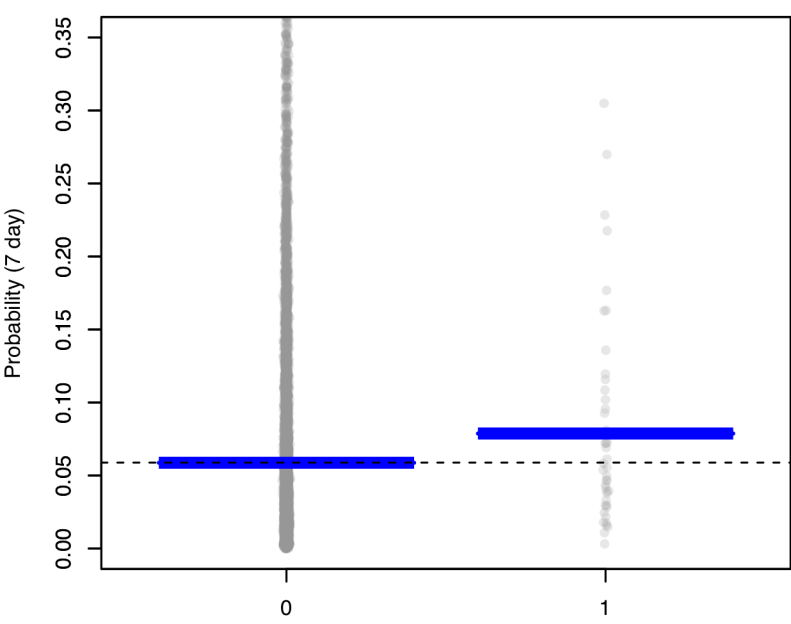

Inflammatory\_Bowel\_Disease (Pct.Var = 0.0)

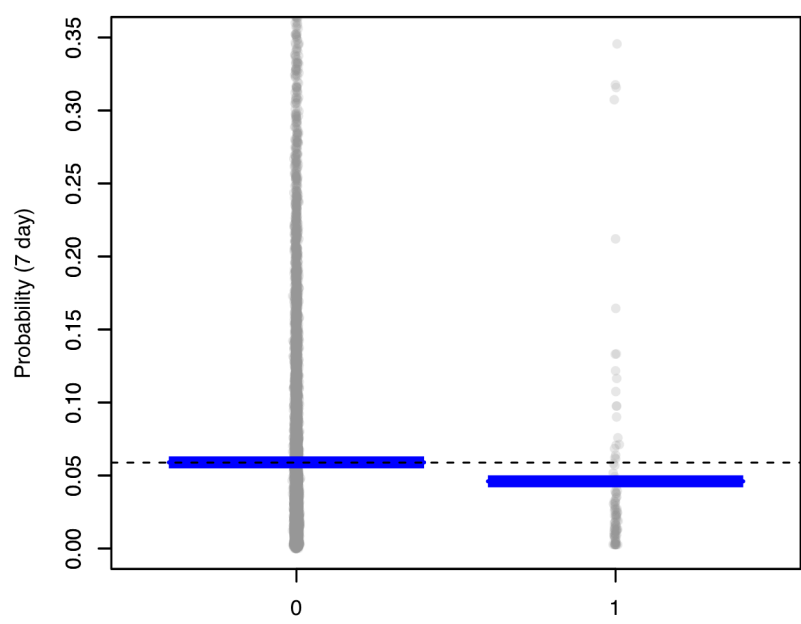

Traumatic\_Amputations\_and\_Complications (Pct.Var = 0.0)

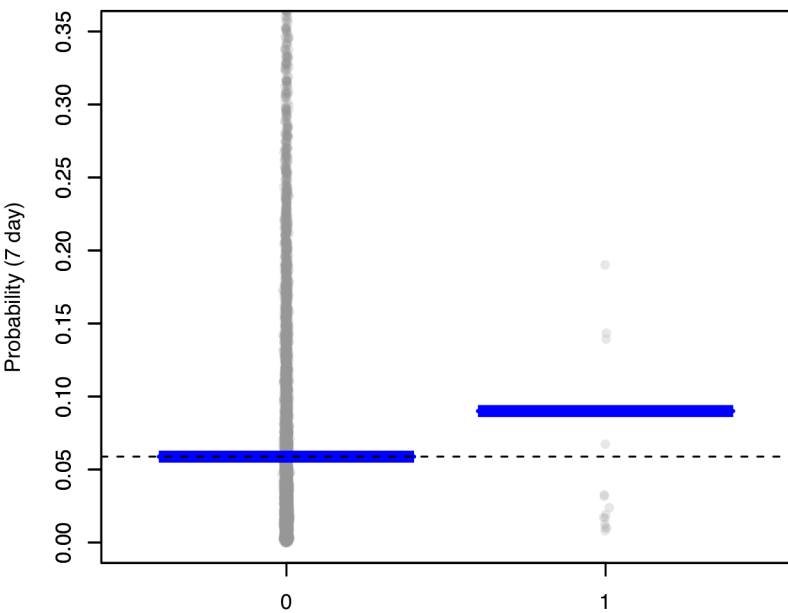

Major\_Depressive\_Bipolar\_and\_Paranoid\_Disorders (Pct.Var = 0.0)

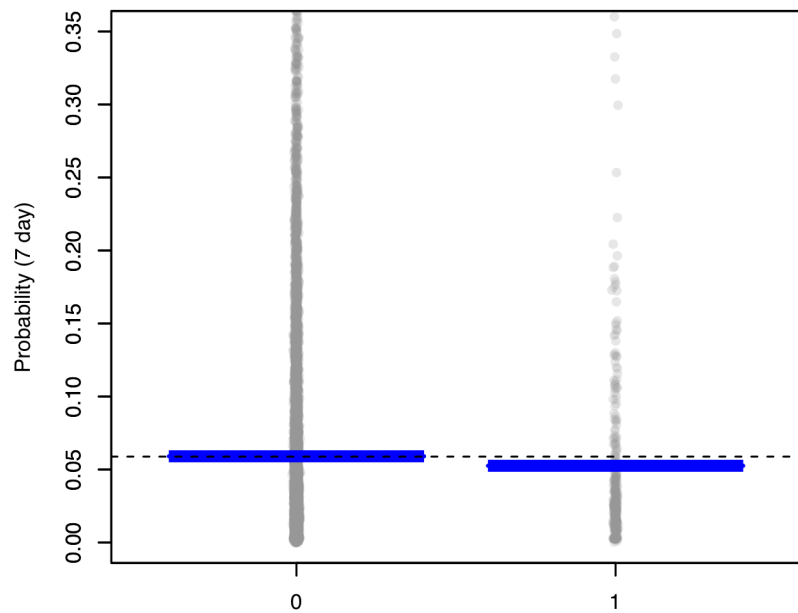

Artificial\_Openings\_for\_Feeding\_or\_Elimination (Pct.Var = 0.0)

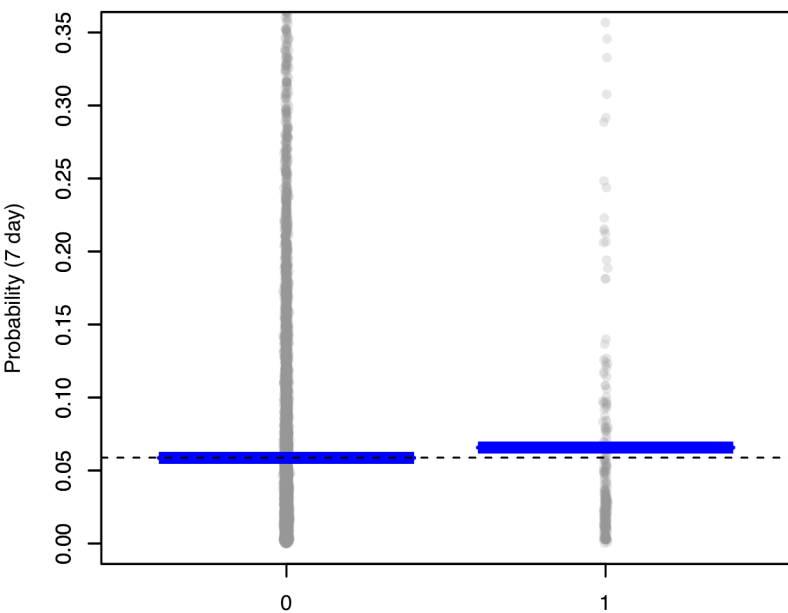

Other\_Significant\_Endocrine\_and\_Metabolic\_Disorders (Pct.Var = 0.0)

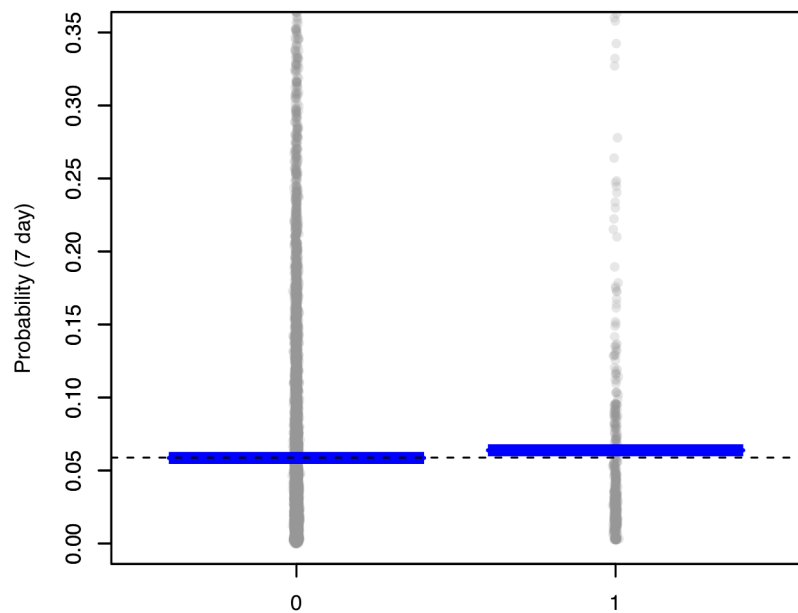

Schizophrenia (Pct.Var = 0.0)

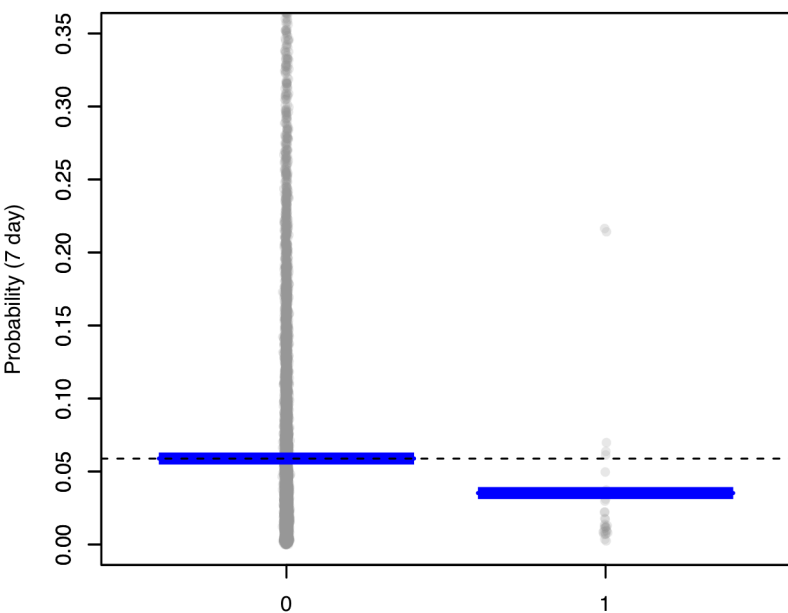

Parkinsons\_and\_Huntingtons\_Diseases (Pct.Var = 0.0)

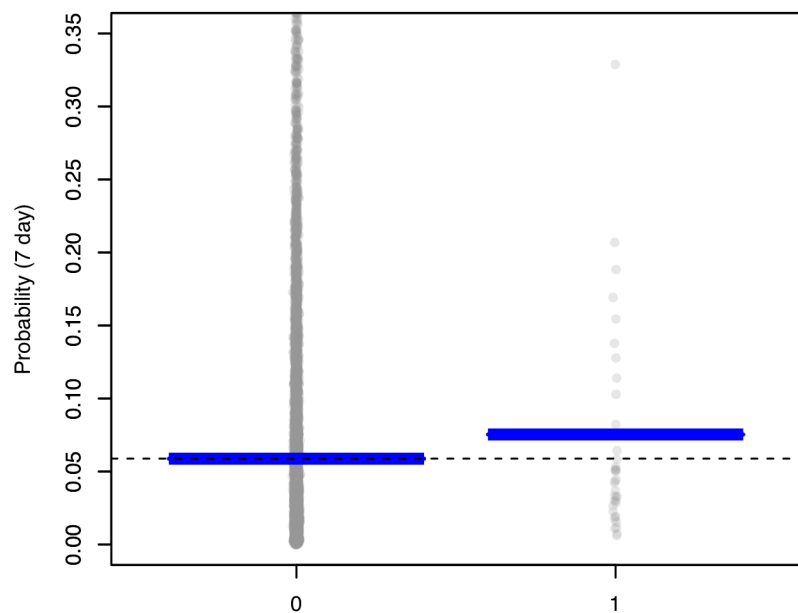

Chronic\_Hepatitis (Pct.Var = 0.0)

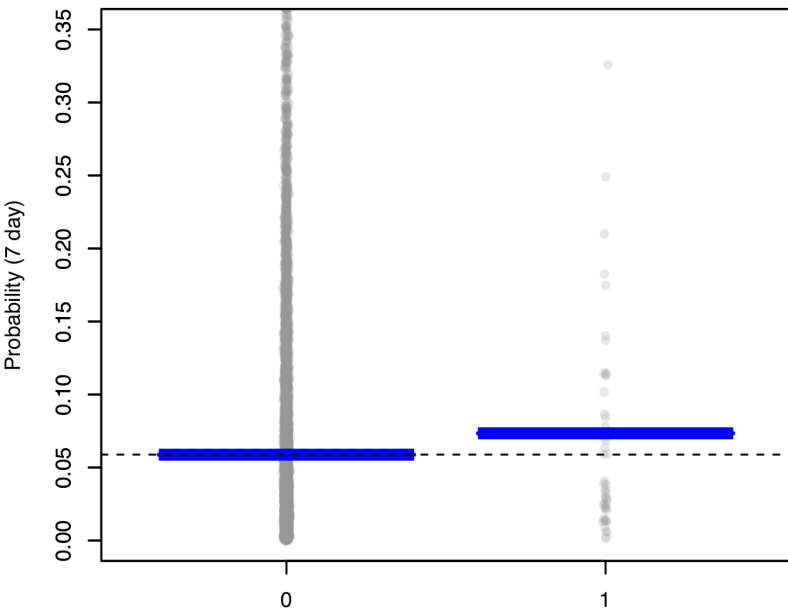

gender (Pct.Var = 0.0)

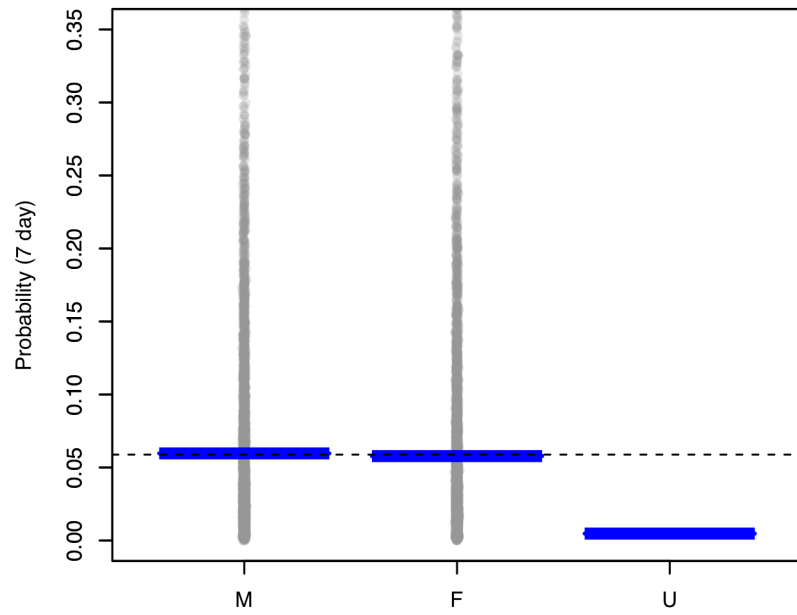

Respiratory\_Arrest (Pct.Var = 0.0)

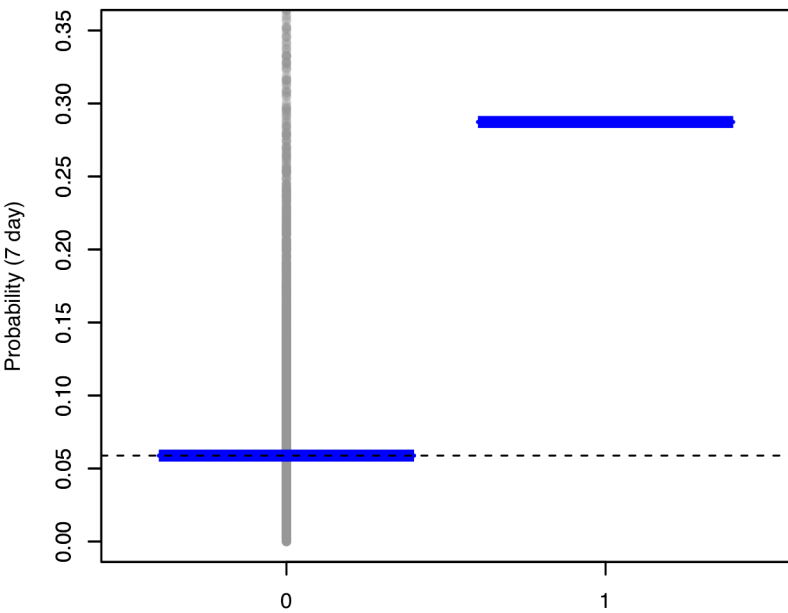

DAYCOV (Pct.Var = 0.0)

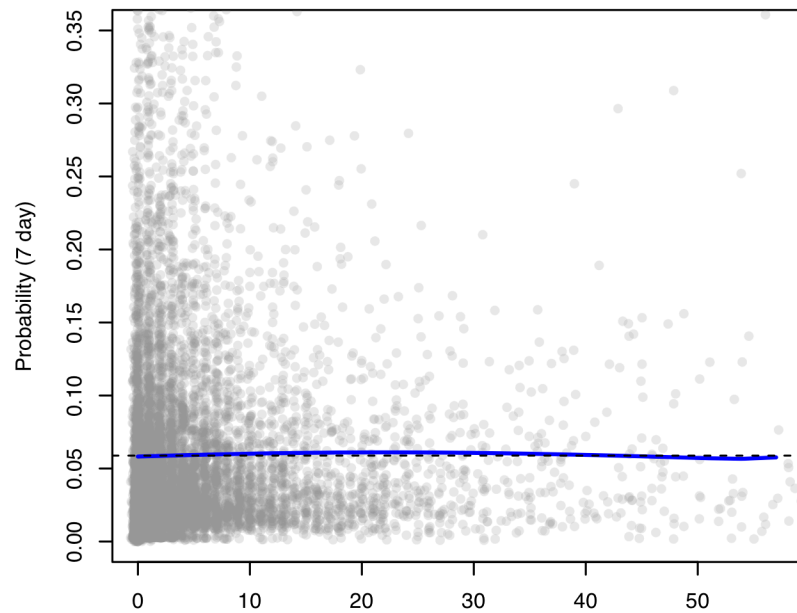

Rheumatoid\_Arthritis\_and\_Inflammatory\_Connective\_Tissue\_Disease (Pct.Var = 0.0)

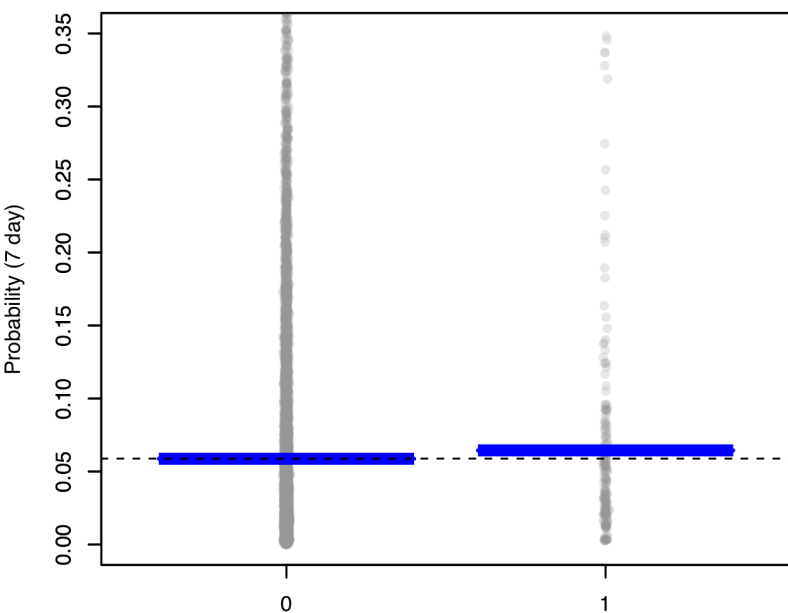

Ischemic\_or\_Unspecified\_Stroke (Pct.Var = 0.0)

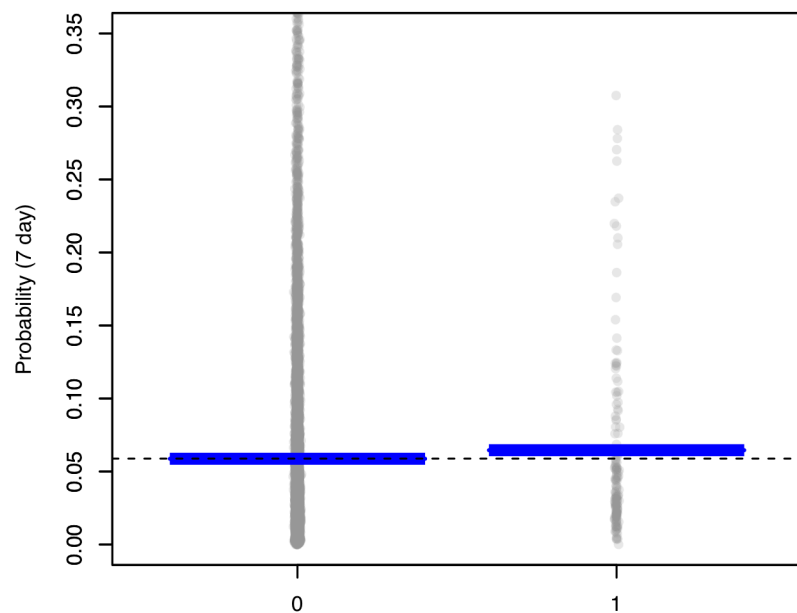

Multiple\_Sclerosis (Pct.Var = 0.0)

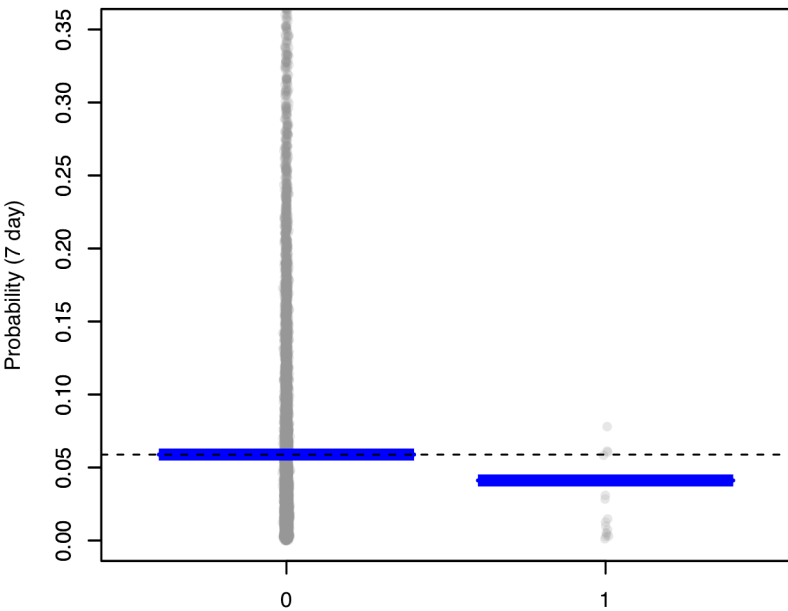

Chronic\_Pancreatitis (Pct.Var = 0.0)

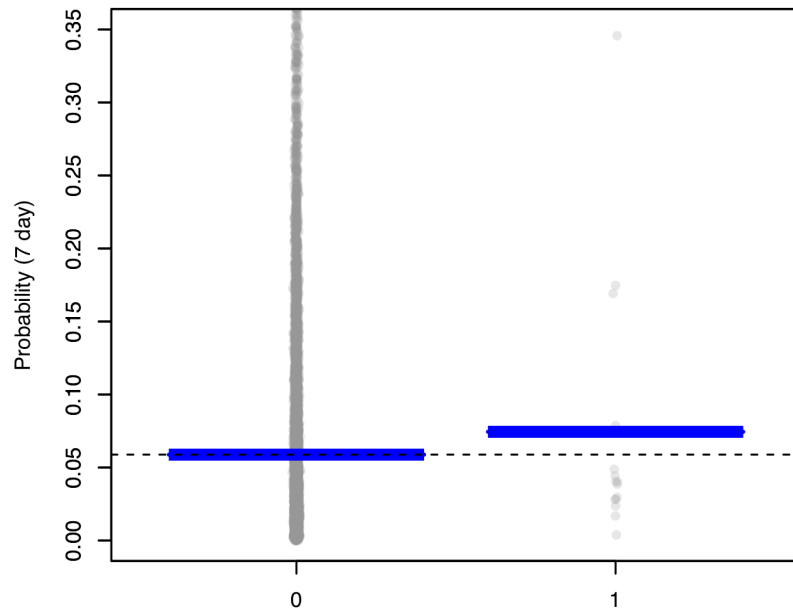

Respirator\_Dependence\_Tracheostomy\_Status (Pct.Var = 0.0)

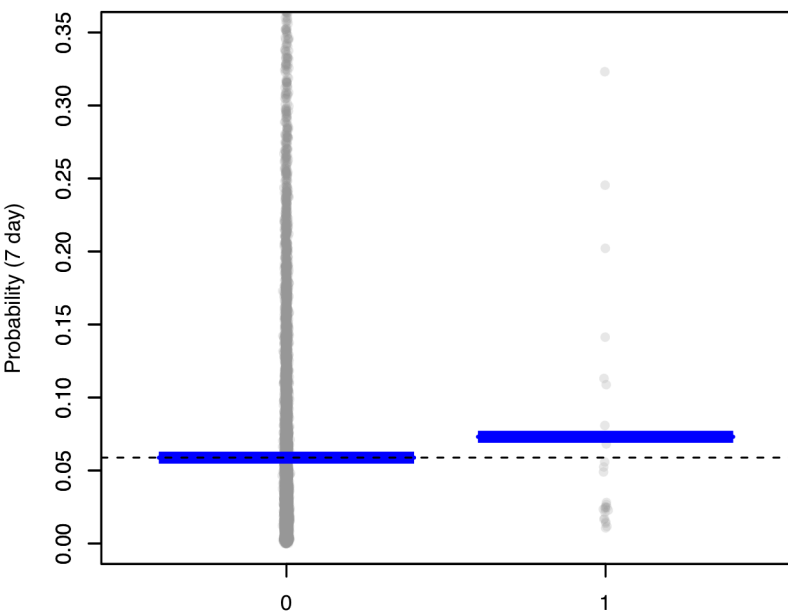

Dementia\_With\_Complications (Pct.Var = 0.0)

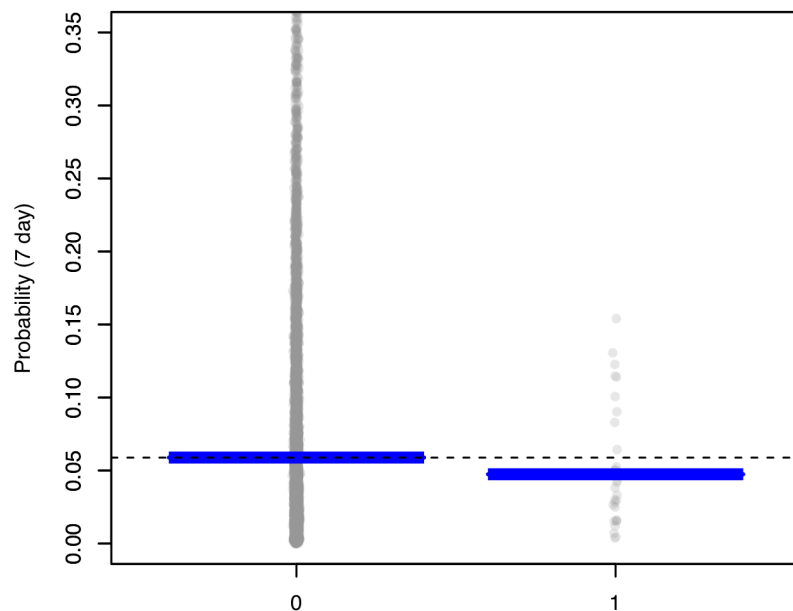

Cerebral\_Palsy (Pct.Var = 0.0)

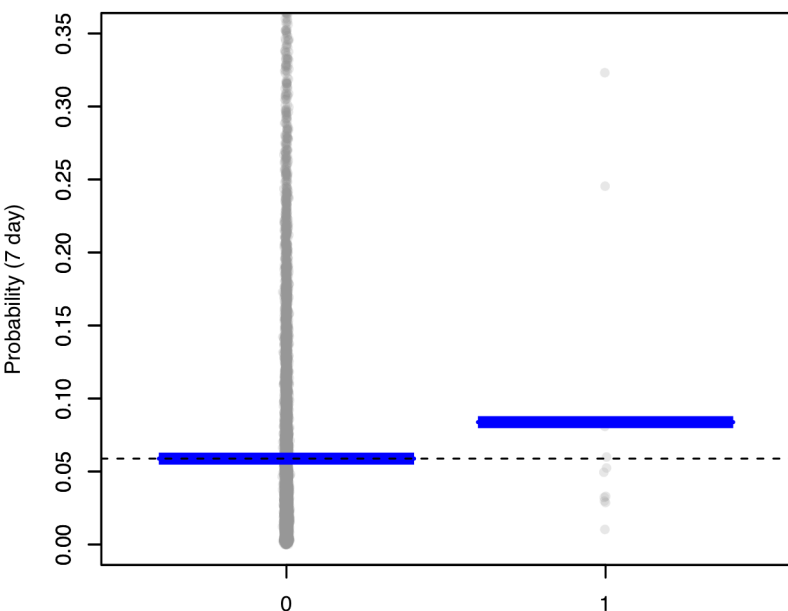

Hemiplegia\_Hemiparesis (Pct.Var = 0.0)

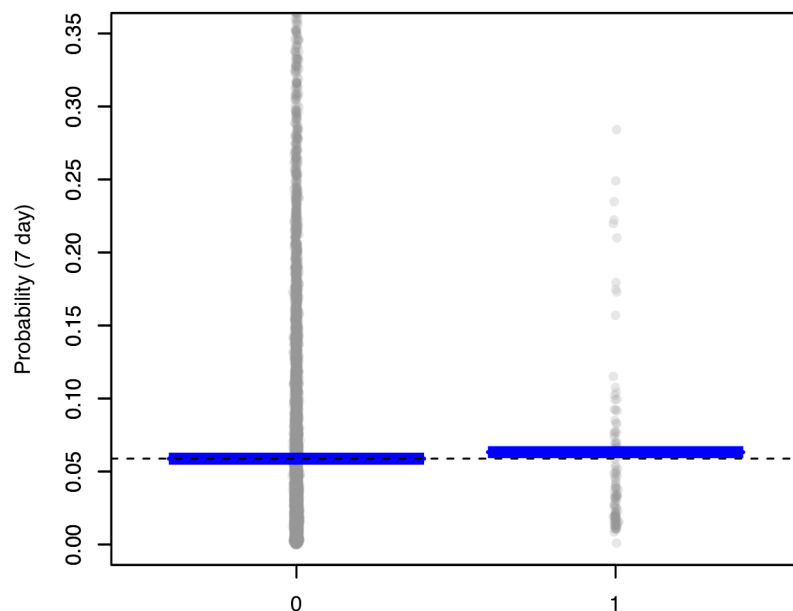

Cerebral\_Hemorrhage (Pct.Var = 0.0)

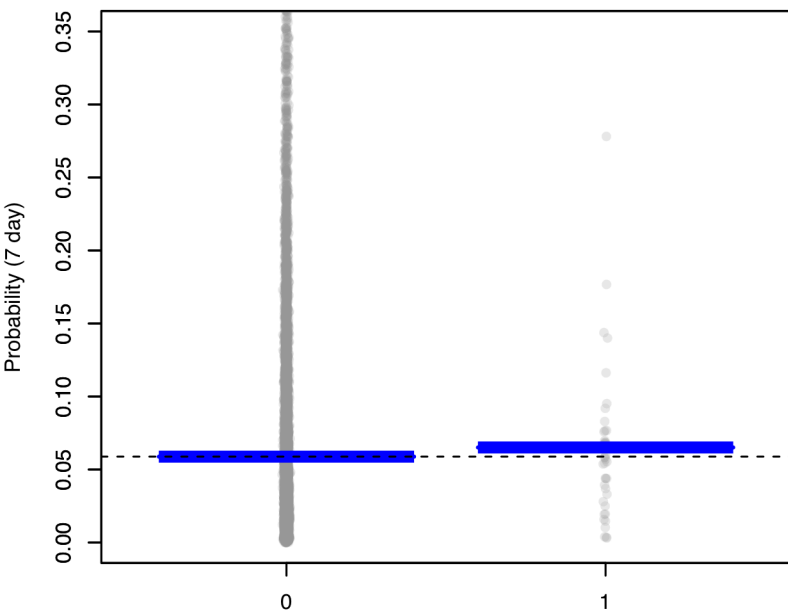

Diabetes\_without\_Complication (Pct.Var = 0.0)

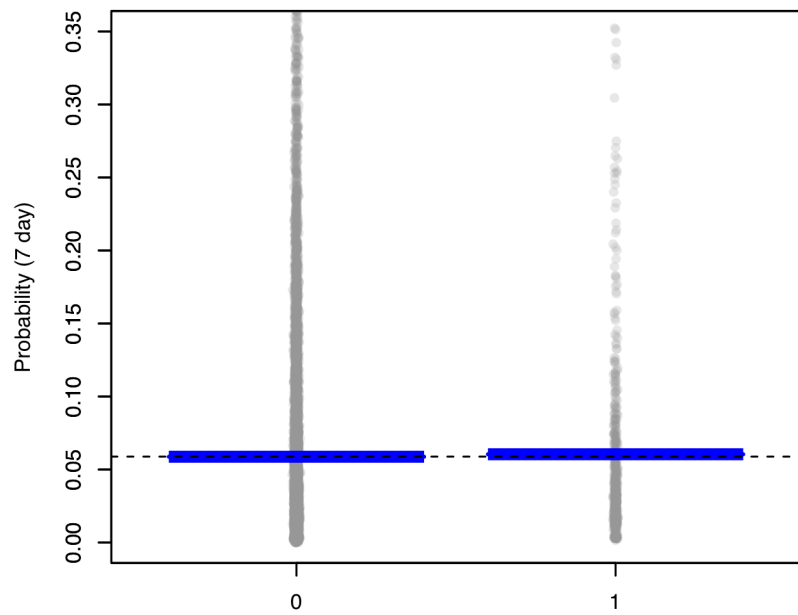

HIV\_AIDS (Pct.Var = 0.0)

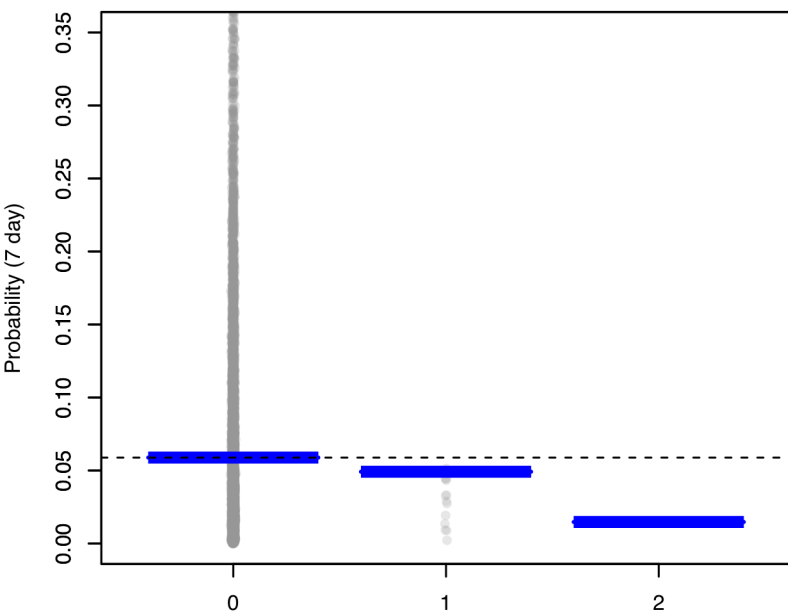

Coma\_Brain\_Compression\_Anoxic\_Damage (Pct.Var = 0.0)

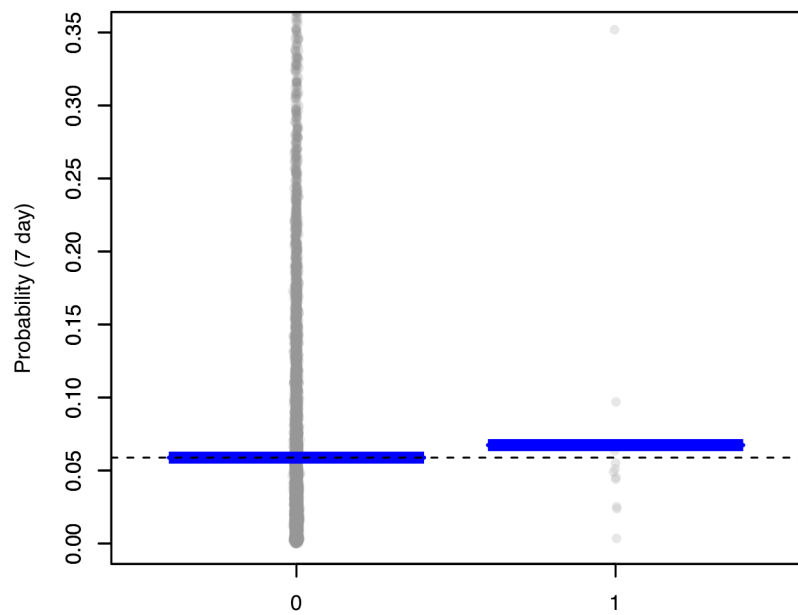

Quadriplegia (Pct.Var = 0.0)

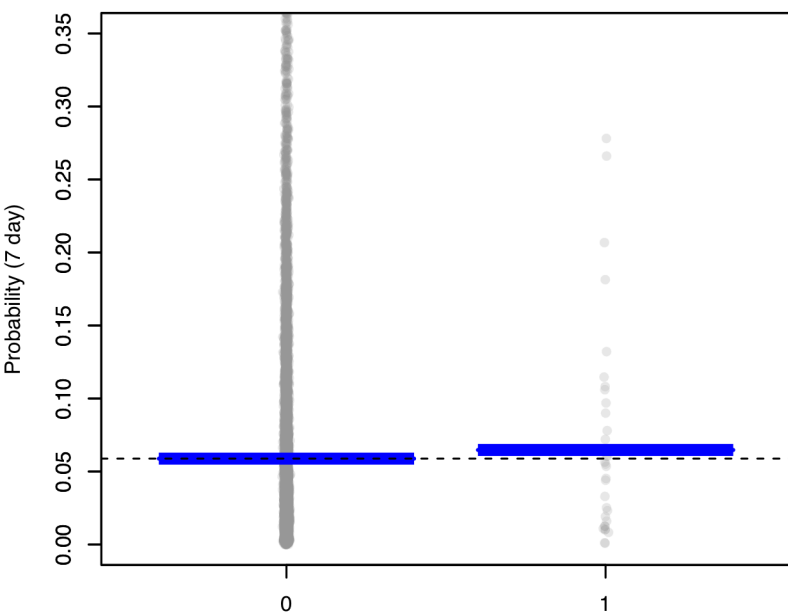

Muscular\_Dystrophy (Pct.Var = 0.0)

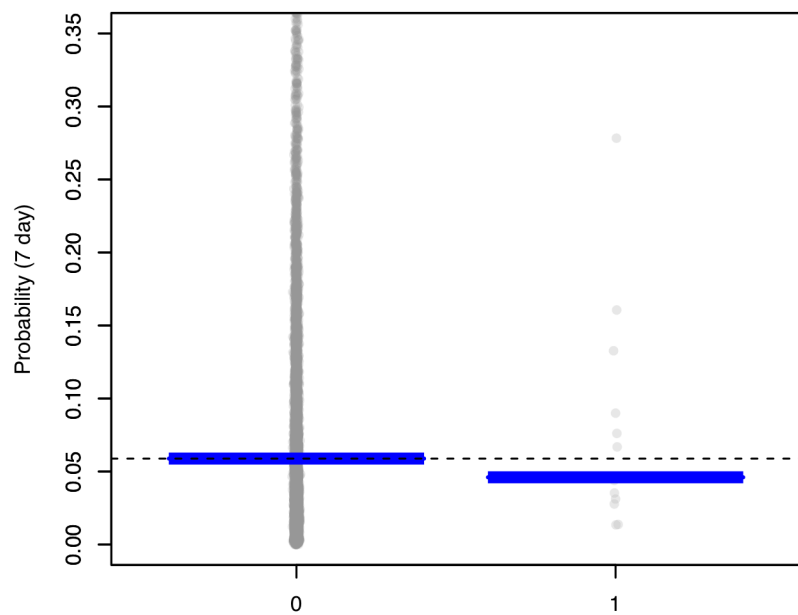

Paraplegia (Pct.Var = 0.0)

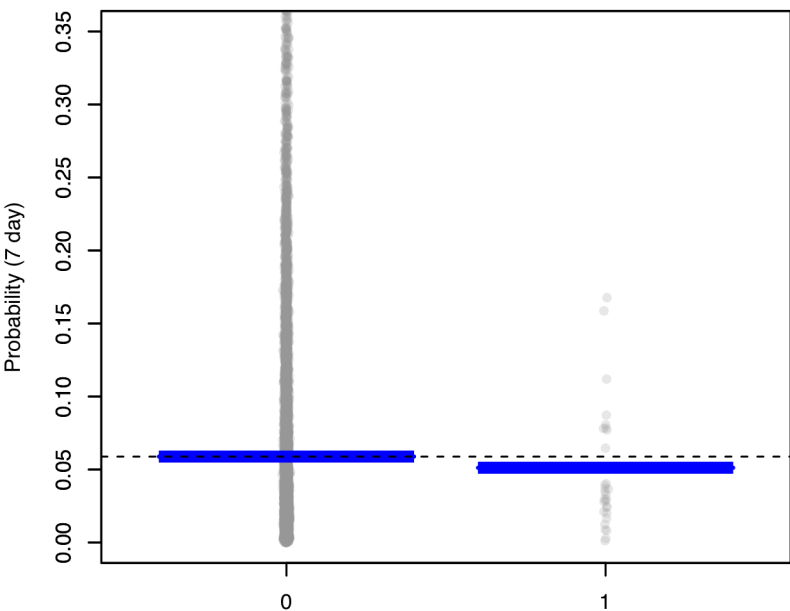

Drug\_Alcohol\_Dependence (Pct.Var = 0.0)

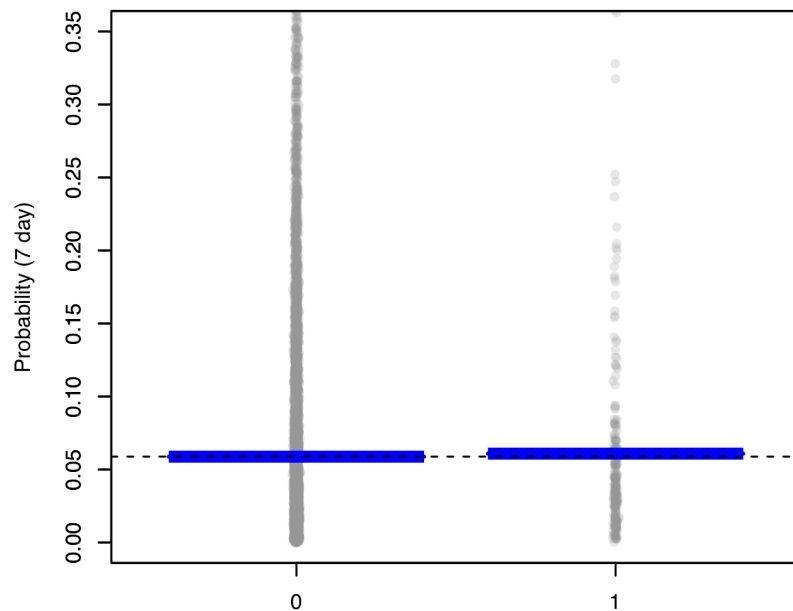

Atrophic\_Lateral\_Sclerosis\_and\_Other\_Motor\_Neuron\_Disease (Pct

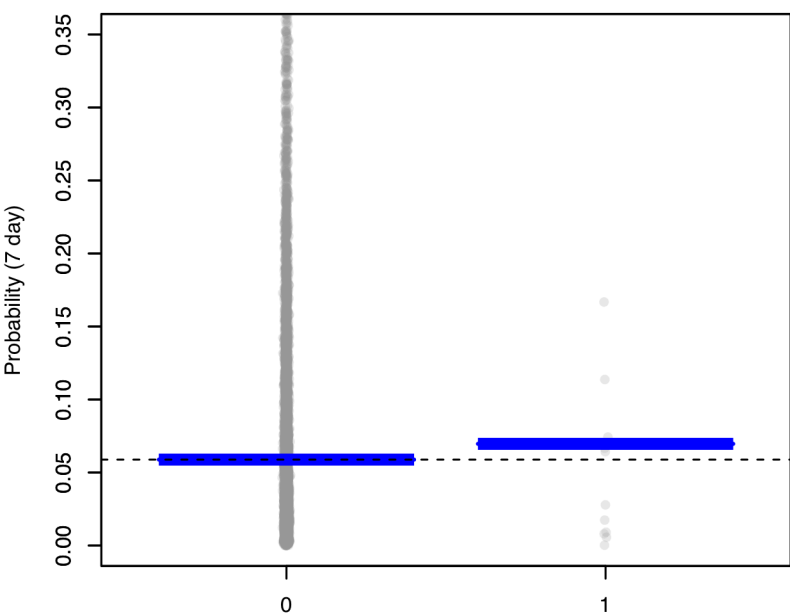

Monoplegia\_Other\_Paralytic\_Syndromes (Pct.Var = 0.0)

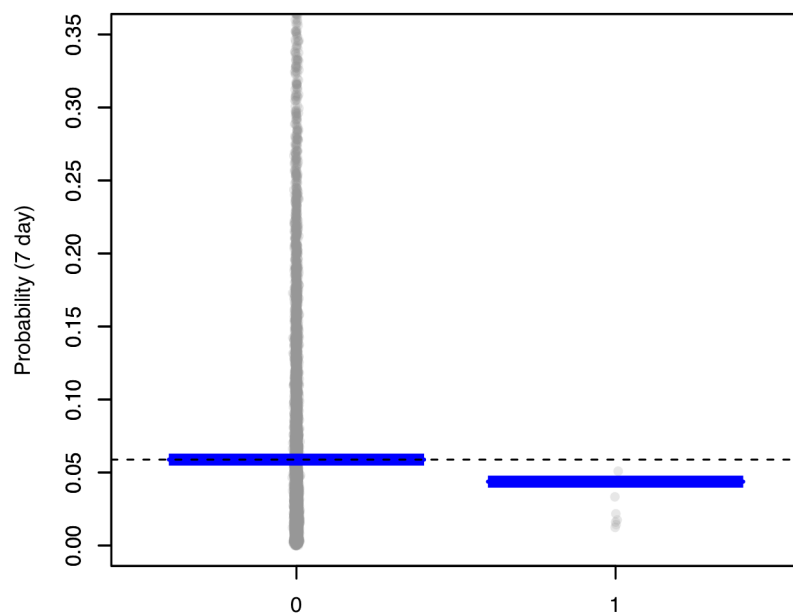

Spinal\_Cord\_Disorders\_Injuries (Pct.Var = 0.0)

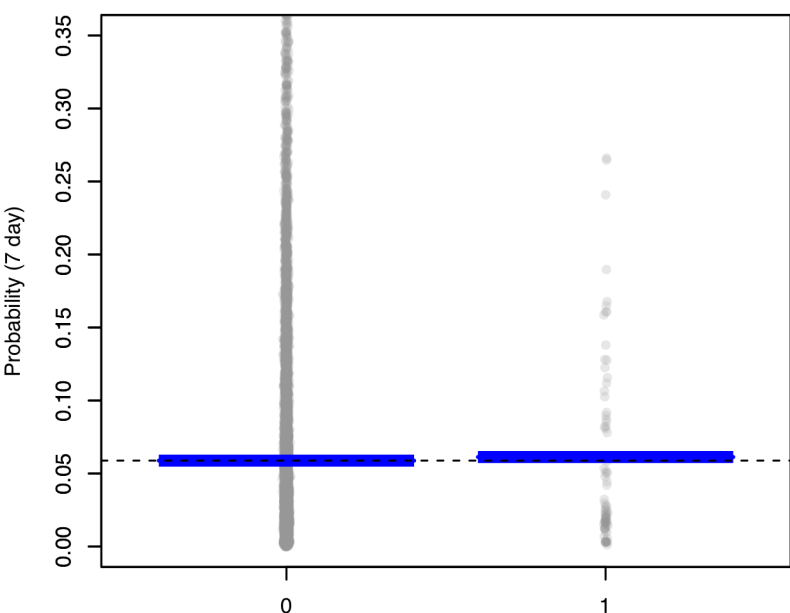

Severe\_Skin\_Burn\_or\_Condition (Pct.Var = 0.0)

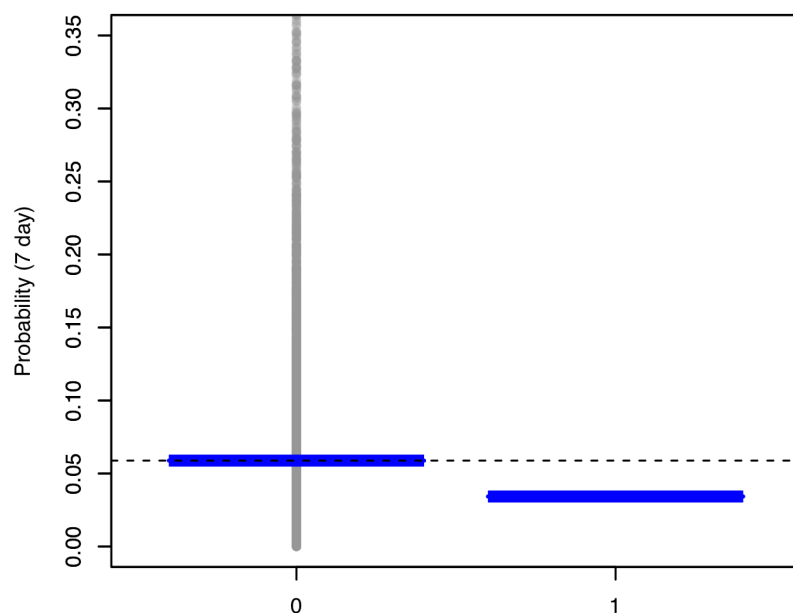



Drug\_Alcohol\_Psychosis (Pct.Var = 0.0)

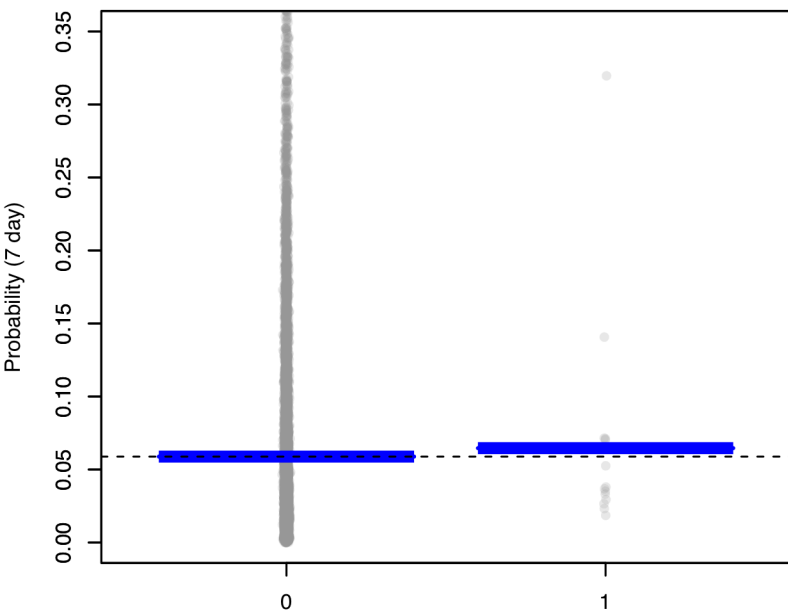

Cystic\_Fibrosis (Pct.Var = 0.0)

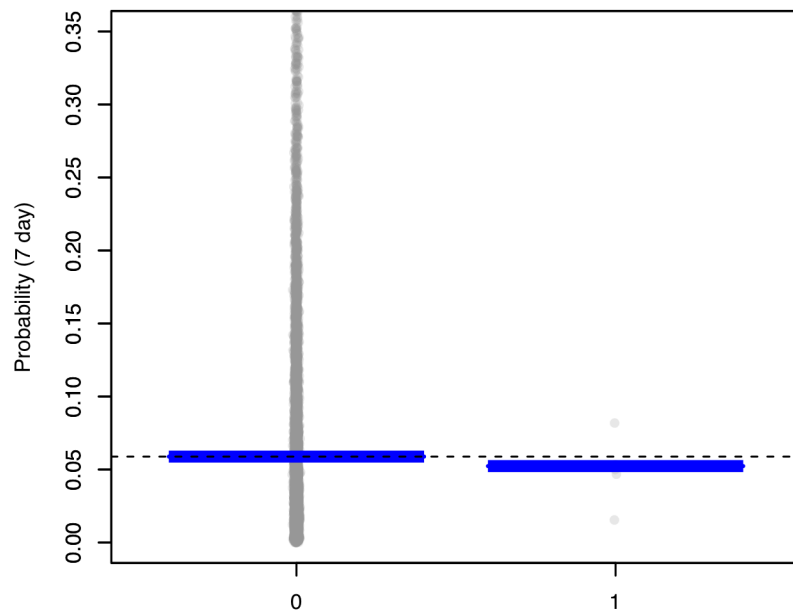

Angina\_Pectoris (Pct.Var = 0.0)

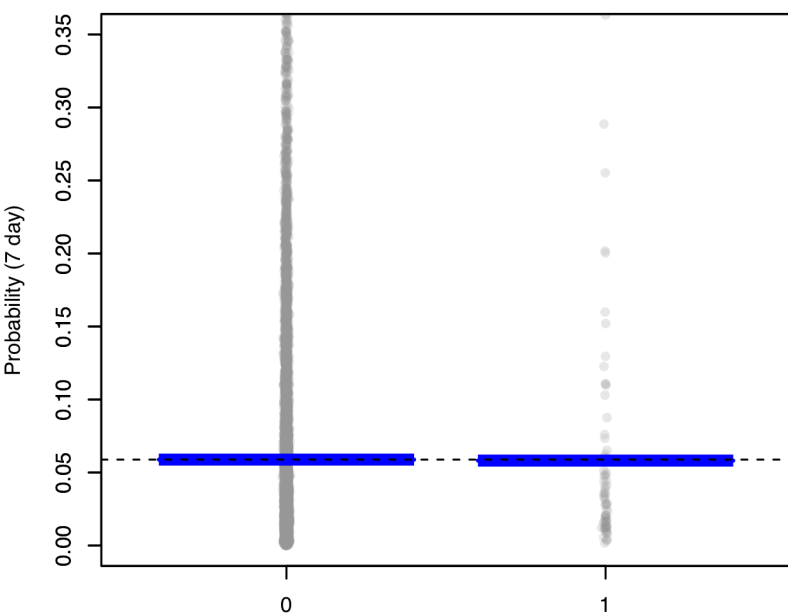

Major\_Head\_Injury (Pct.Var = 0.0)

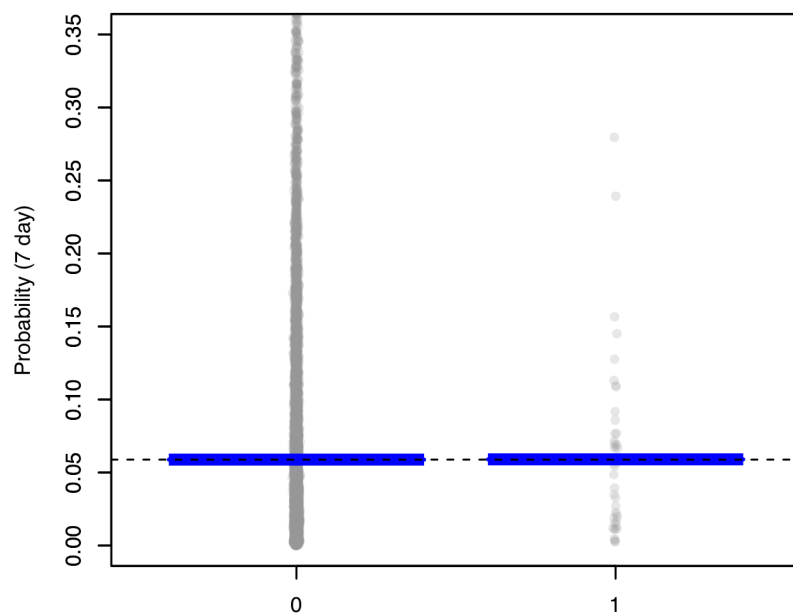

Diabetes\_with\_Acute\_Complications (Pct.Var = 0.0)

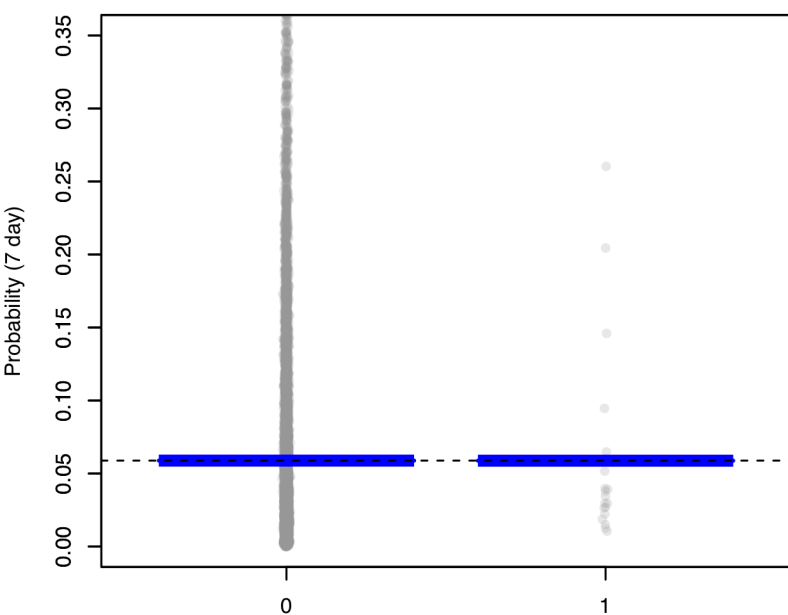

Supplement: ocaa211_supplementary_data.pdf [file ocaa211_supplementary_data.pdf]
